# Supplementary material
Source: MDPI journal article supplement (https://www.mdpi.com/2075-163X/9/8/466)
Supplement: s1 [file s1]

Archive with 2 entries (2 files):
- Supplementary Materials File 1.pdf
- Supplementary Materials File 2.pdf
