# Supplementary material
Source: MDPI journal article supplement (https://www.mdpi.com/2075-163X/9/8/466)
Supplement: s1 [file s1]

Supplementary Materials File 1

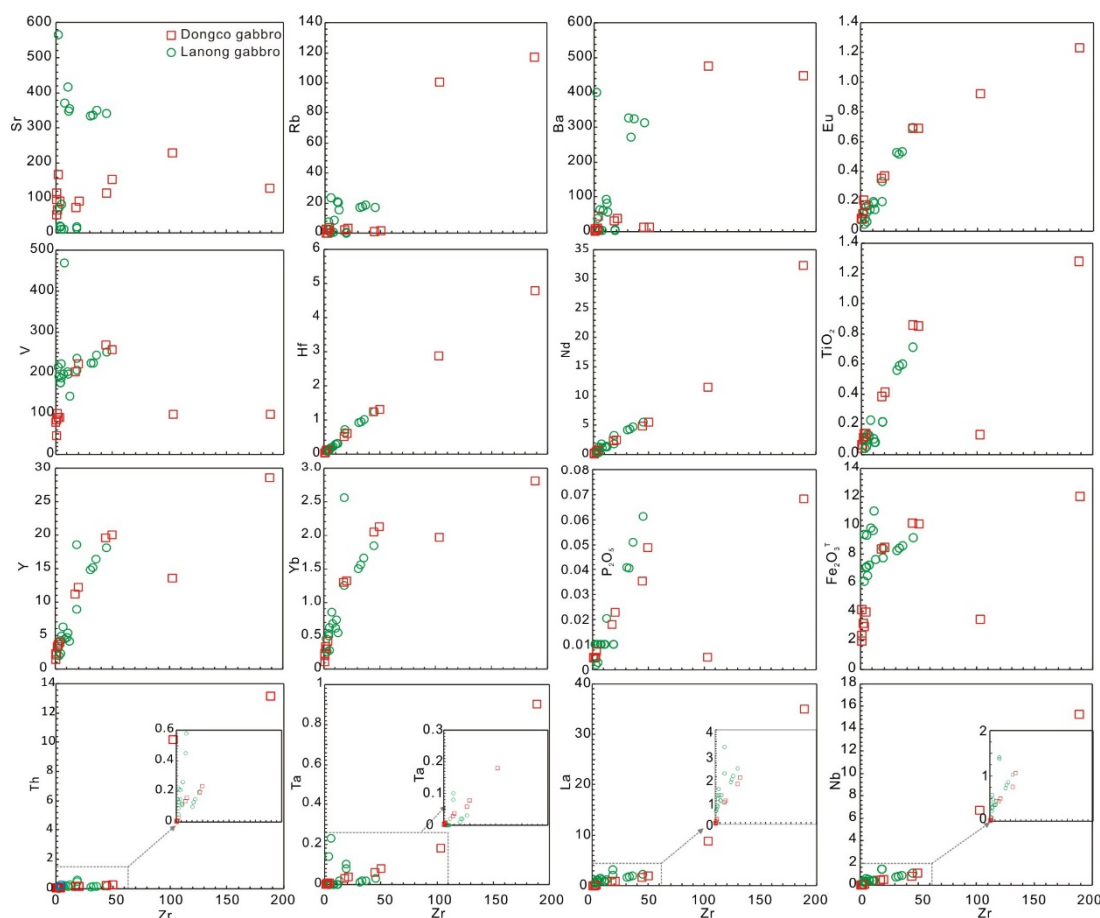

**Figure S1.** Selected trace elements (ppm) versus Zr (ppm) diagrams of the Dongco and Lanong ophiolites for evaluating element mobility during low-medium temperature hydrothermal alteration.

Our petrographic observations indicate that the investigated mafic rocks from the Lanong and Dongco ophiolites were affected to some extent by post-solidification alteration processes. This observation is consistent with their low to moderate LOI values (1.52–6.39 wt % and 0.94–5.01 wt %, respectively). Zirconium is widely used as an alteration-independent index of geochemical compositions because it is one of the least mobile elements during low-temperature alteration [1,2]. Rb, Sr, and Ba in gabbros do not correlate with Zr, indicating that they were probably affected by alteration. However, some major-element oxides such as  $P_2O_5$ , MnO, and  $TiO_2$ , some incompatible trace elements such as Hf, Th, Y, Ta, Nb, as well as the rare earth element (REE) of these samples show good correlation with the relatively immobile Zr imply that their concentrations were not disturbed by any metamorphic or hydrothermal alteration processes (Figure S1) [1]. Consequently, only those elements that were not significantly affected by post-magmatic processes were used in the geochemical analysis.

**Table S1.** Ages of ophiolitic fragments from Bangong-Nujiang Suture Zone (BNSZ), central Tibetan Plateau.

| Location                  | Age (Ma)     | Lithology           | Dating Method                                                 | Tectonic Setting                                                 | References |
|---------------------------|--------------|---------------------|---------------------------------------------------------------|------------------------------------------------------------------|------------|
| Western ophiolites        |              |                     |                                                               |                                                                  |            |
| Zhabu Village             | 184.4 ± 4.4  | dolerite            | Zircon LA-ICP-MS U-Pb                                         | mid-oceanic ridge                                                | [3]        |
| Zhabu Village             | 181.9 ± 2.6  | gabbro              | Zircon LA-ICP-MS U-Pb                                         | mid-oceanic ridge                                                | [3]        |
| West Bangong Lake         | 167.0 ± 1.4  | gabbro              | Zircon SHRIMP U-Pb                                            | supra-subduction zone                                            | [4]        |
| West Bangong Lake         | 254.0 ± 28.0 | peridotite          | Whole-rock Re-Os                                              | mid-oceanic ridge                                                | [5]        |
| Bangong Lake              | 129.2 ± 0.4  | gabbro              | Zircon LA-ICP-MS U-Pb                                         | fore-arc basin                                                   | [6]        |
| Bangong Lake              | 231.5 ± 2.6  | gabbro              | Zircon LA-ICP-MS U-Pb                                         | mid-oceanic ridge                                                | [7]        |
| Rebang Co                 | 161.5 ± 1.5  | gabbro              | Zircon LA-ICP-MS U-Pb                                         | back-arc spreading associated with intra-oceanic subduction zone | [8]        |
| Cuomuqu                   | 164.3 ± 1.9  | diabase             | Zircon LA-ICP-MS U-Pb                                         | back-arc spreading associated with intra-oceanic subduction zone | [9]        |
| Cuomuqu                   | 156.4 ± 1.4  | plagiogranite       | Zircon LA-ICP-MS U-Pb                                         | back-arc spreading associated with intra-oceanic subduction zone | [9]        |
| Majiari                   | 170.5 ± 1.7  | gabbro              | Zircon LA-ICP-MS U-Pb                                         | back-arc spreading associated with intra-oceanic subduction zone | [10]       |
| Majiari                   | 108.4 ± 2.6  | gabbro              | Plagioclase <sup>40</sup> Ar/ <sup>39</sup> Ar (plateau age)  | intra-oceanic subduction zone                                    | [10]       |
| Majiari                   | 112.0 ± 2.0  | gabbro              | Plagioclase <sup>40</sup> Ar/ <sup>39</sup> Ar (isochron age) | supra-subduction zone                                            | [10]       |
| Rutog                     | 165.5 ± 1.9  | Gabbro              | Zircon LA-ICP-MS U-Pb                                         | supra-subduction zone                                            | [11]       |
| Rutog                     | 169.0 ± 2.0  | gabbro              | Zircon LA-ICP-MS U-Pb                                         | back-arc basin associated with intra-oceanic subduction zone     | [12]       |
| Middle-western ophiolites |              |                     |                                                               |                                                                  |            |
| Gerze                     | 177.6 ± 3.4  | amphibolite         | Hornblendes <sup>40</sup> Ar/ <sup>39</sup> Ar                | back-arc basin                                                   | [13]       |
| Gerze                     | 176.0 ± 3.9  | amphibolite         | Hornblendes <sup>40</sup> Ar/ <sup>39</sup> Ar                | back-arc basin                                                   | [13]       |
| Gerze                     | 176.2 ± 9.0  | olivine diabase     | Zircon LA-ICP-MS U-Pb                                         | oceanic island                                                   | [3]        |
| Gerze                     | 191.0 ± 22.0 | gabbro              | Whole-rock Sm-Nd                                              | spreading oceanic basin                                          | [14]       |
| Gerze                     | 140.0 ± 4.1  | gabbro              | Hornblendes K-Ar                                              | supra-subduction zone                                            | [14]       |
| Gerze                     | 152.3 ± 3.6  | gabbro              | whole-rock K-Ar                                               | supra-subduction zone                                            | [14]       |
| Dongco                    | 222.5 ± 3.6  | gabbro              | Zircon LA-ICP-MS U-Pb                                         | intra-oceanic subduction zone                                    | [15]       |
| Dongco                    | 177.6 ± 3.3  | amphibolite         | Hornblendes <sup>40</sup> Ar/ <sup>39</sup> Ar                | back-arc basin                                                   | [13]       |
| Dongco                    | 167.0±7.2    | amphibolite         | Hornblendes <sup>40</sup> Ar/ <sup>39</sup> Ar                | back-arc basin                                                   | [13]       |
| Dongco                    | 166.0 ± 4.0  | amphibole-gabbro    | Zircon SHRIMP U-Pb                                            | oceanic island                                                   | [16]       |
| Dongco                    | 148.2 ± 1.5  | Am-schist           | Hornblendes <sup>40</sup> Ar/ <sup>39</sup> Ar                | oceanic island                                                   | [16]       |
| Dongco                    | 167.0 ± 2.0  | gabbro              | Zircon LA-ICP-MS U-Pb                                         | back-arc basin associated with intra-oceanic subduction zone     | [11]       |
| Dongco                    | 132.0 ± 3.0  | cumulate troctolite | Zircon SHRIMP U-Pb                                            | oceanic island                                                   | [17]       |
| Dongco                    | 137.4 ± 2.7  | basalt              | Whole-rock <sup>40</sup> Ar/ <sup>39</sup> Ar                 | oceanic island                                                   | [17]       |
| Dongco                    | 140.9 ± 2.8  | basalt              | Whole-rock <sup>40</sup> Ar/ <sup>39</sup> Ar                 | oceanic island                                                   | [17]       |
| Dongco                    | 169.0 ± 3.7  | anorthosite         | Zircon SIMS U-Pb                                              | back-arc basin associated with intra-oceanic subduction zone     | This study |
| Dongco                    | 184.5 ± 1.9  | amphibolite-gabbro  | Hornblendes <sup>40</sup> Ar/ <sup>39</sup> Ar (plateau age)  | oceanic plateau magmatism                                        | [18]       |
| Dongco                    | 123.0 ± 1.3  | basalt              | Whole-rock <sup>40</sup> Ar/ <sup>39</sup> Ar (plateau ag)    | oceanic plateau magmatism                                        | [18]       |

|                    |              |                  |                                                               |                                                                  |            |
|--------------------|--------------|------------------|---------------------------------------------------------------|------------------------------------------------------------------|------------|
| Zhonggang          | 116.2±4.1    | gabbro dike      | Zircon LA-ICP-MS U-Pb                                         | oceanic island                                                   | [19]       |
| Zhonggang          | 117–120      | gabbro           | Zircon LA-ICP-MS U-Pb                                         | oceanic island                                                   | [20,21]    |
| Zhonggang          | 162–168      | basalt           | Zircon LA-ICP-MS U-Pb                                         | oceanic island                                                   | [20,21]    |
| Zhonggang          | 248–255      | basalt           | Zircon LA-ICP-MS U-Pb                                         | oceanic island                                                   | [20,21]    |
| Kangqiong          | 114.6 ± 3.7  | boninitic dikes  | Zircon LA-ICP-MS U-Pb                                         | fore-arc spreading associated with intra-oceanic subduction zone | [22]       |
| Kangqiong          | 165.0 ± 2.5  | boninitic dikes  | Zircon LA-ICP-MS U-Pb                                         | fore-arc spreading associated with intra-oceanic subduction zone | [22]       |
| Middle ophiolites  |              |                  |                                                               |                                                                  |            |
| Daguo–Yunzhug      | 150.6 ± 2.4  | gabbroic dikes   | Zircon LA-ICP-MS U-Pb                                         | slow spreading oceanic setting                                   | [23]       |
| Duoma              | 115.4        | pillow basalt    | Clinopyroxene <sup>40</sup> Ar/ <sup>39</sup> Ar (plateau ag) | oceanic island                                                   | [24]       |
| Tarenben           | 107.7 ± 8.1  | basalt           | Zircon SHRIMP U-Pb                                            | oceanic island                                                   | [24]       |
| Dongqiao           | 187 ± 2      | gabbro           | Zircon LA-ICP-MS U-Pb                                         | back-arc basin associated with intra-oceanic subduction zone     | [12]       |
| Dongqiao           | 187.8 ± 3.7  | cumulate gabbro  | Zircon SHRIMP U-Pb                                            | oceanic basin                                                    | [25]       |
| Dongqiao           | 188.4 ± 1.2  | layered gabbro   | Zircon SIMS U-Pb                                              | initial fore-arc oceanic basin                                   | [26]       |
| Dongqiao           | 181.4 ± 1.3  | amphibole gabbro | Zircon LA-ICP-MS U-Pb                                         | initial fore-arc oceanic basin                                   | [26]       |
| Dongqiao           | 251.0 ± 65.0 | cumulate rocks   | Whole-rock Re-Os                                              | supra-subduction zone                                            | [27]       |
| Amdo               | 188.0 ± 2.0  | plagiogranite    | Zircon SHRIMP U-Pb                                            | spreading oceanic basin                                          | [28]       |
| Amdo               | 184.0 ± 2.0  | gabbro           | Zircon LA-ICP-MS U-Pb                                         | back-arc basin associated with intra-oceanic subduction zone     | [12]       |
| Amdo               | 177.0 ± 2.0  | plagiogranite    | Zircon LA-ICP-MS U-Pb                                         | back-arc basin associated with intra-oceanic subduction zone     | [12]       |
| Jiang Tso          | 188.1 ± 4.1  | gabbro           | Zircon SHRIMP U-Pb                                            | back-arc basin associated with supra-subduction zone             | [29,30]    |
| Jiang Tso          | 189.8 ± 3.3  | gabbro           | Zircon SHRIMP U-Pb                                            | back-arc basin associated with supra-subduction zone             | [29,30]    |
| Lanong             | 167.3 ± 1.1  | gabbro           | Zircon LA-ICP-MS U-Pb                                         | fore-arc basin                                                   | This study |
| Lanong             | 166.8 ± 0.9  | anorthosite      | Zircon LA-ICP-MS U-Pb                                         | fore-arc basin                                                   | This study |
| Lanong             | 244.1 ± 3.0  | doleritic        | Zircon LA-ICP-MS U-Pb                                         | oceanic island                                                   | [31]       |
| Lanong             | 147.6 ± 2.3  | basalt           | Zircon LA-ICP-MS U-Pb                                         | continental fore-arc basin                                       | [31]       |
| Lanong             | 149.1 ± 1.2  | gabbro-doleritic | Zircon LA-ICP-MS U-Pb                                         | continental fore-arc basin                                       | [31]       |
| Nagqu              | 183.7 ± 1    | gabbro           | Zircon LA-ICP-MS U-Pb                                         | mature back-arc basin                                            | [32]       |
| Nagqu              | 128          | cumulate gabbro  | Zircon TIMS U-Pb                                              | supra-subduction zone                                            | [33]       |
| Nagqu              | 120 ± 1.4    | basalt           | Whole-rock K-Ar                                               | supra-subduction zone                                            | [33]       |
| Eastern ophiolites |              |                  |                                                               |                                                                  |            |
| Dingqing           | 178.0 ± 3.0  | gabbro           | Zircon LA-ICP-MS U-Pb                                         | back-arc basin associated with intra-oceanic subduction zone     | [12]       |
| Dingqing           | 164.0 ± 2.0  | leucogabbro      | Zircon LA-ICP-MS U-Pb                                         | back-arc basin associated with intra-oceanic subduction zone     | [12]       |
| Dingqing           | 217.8 ± 1.6  | cumulate gabbro  | Zircon SIMS U-Pb                                              | mid-oceanic ridge                                                | [34]       |

**Table S2.** Whole-rock major (wt %), and trace elements (ppm; including REEs) data of Dongco and Lanong ophiolitic anorthosites and gabbros (including standards rocks) in the middle segments of Bangon-Nuijiang Suture Zone (BNSZ), central Tibetan Plateau.

| Location                         |           | Lanong Ophiolitic Fragments |           |           |           |           |           |           |           |           |           |            |
|----------------------------------|-----------|-----------------------------|-----------|-----------|-----------|-----------|-----------|-----------|-----------|-----------|-----------|------------|
| Data Sources                     |           | This Study                  |           |           |           |           |           |           |           |           |           |            |
| Rock Type                        | Gabbro    | Gabbro                      | Gabbro    | Gabbro    | Gabbro    | Gabbro    | Gabbro    | Gabbro    | Gabbro    | Gabbro    | Gabbro    | Gabbro     |
| Sample Name                      | 16XLN02-1 | 16XLN02-2                   | 16XLN02-3 | 16XLN02-4 | 16XLN02-5 | 16XLN07-1 | 16XLN07-4 | 16XLN07-5 | 16XLN09-3 | 16XLN09-4 | 16XLN09-5 | 16XBLN02-1 |
| Al <sub>2</sub> O <sub>3</sub>   | 14.88     | 15.96                       | 17.28     | 15.98     | 17.61     | 16.92     | 18.78     | 20.23     | 18.68     | 13.96     | 14.48     | 15.62      |
| BaO                              | 0.01      | 0.01                        | 0.01      | 0.01      | 0.05      | 0.01      | 0.02      | 0.01      | 0.01      | 0.01      | 0.01      | 0.04       |
| CaO                              | 19.35     | 17.4                        | 17.9      | 17.45     | 12.1      | 8.45      | 9.16      | 9.92      | 10.5      | 16.8      | 18.15     | 9.73       |
| Cr <sub>2</sub> O <sub>3</sub>   | 0.01      | 0.01                        | 0.01      | 0.01      | 0.01      | 0.01      | 0.01      | 0.01      | 0.01      | 0.08      | 0.06      | 0.02       |
| Fe <sub>2</sub> O <sub>3</sub> T | 6.3       | 6.86                        | 6.7       | 6.78      | 9         | 10.62     | 9.31      | 7.33      | 9.44      | 8.12      | 7.44      | 8.4        |
| K <sub>2</sub> O                 | 0.02      | 0.02                        | 0.03      | 0.02      | 0.24      | 1.39      | 1.46      | 1.05      | 0.76      | 0.03      | 0.02      | 0.91       |
| MgO                              | 9.53      | 11.2                        | 9.88      | 10.65     | 10.75     | 10.45     | 9.07      | 7.93      | 5.72      | 11.15     | 10        | 7.74       |
| MnO                              | 0.14      | 0.13                        | 0.14      | 0.14      | 0.15      | 0.2       | 0.19      | 0.14      | 0.12      | 0.19      | 0.17      | 0.16       |
| Na <sub>2</sub> O                | 0.13      | 0.11                        | 0.12      | 0.14      | 1.59      | 1.44      | 1.54      | 2.37      | 2.92      | 0.16      | 0.11      | 3.15       |
| P <sub>2</sub> O <sub>5</sub>    | <0.01     | <0.01                       | <0.01     | <0.01     | <0.01     | 0.01      | <0.01     | 0.02      | 0.01      | 0.01      | 0.01      | 0.05       |
| SiO <sub>2</sub>                 | 46.15     | 43.37                       | 42.69     | 43.84     | 44.64     | 46.97     | 46.76     | 47.13     | 47.88     | 45.78     | 45.39     | 51.18      |
| SrO                              | 0.01      | <0.01                       | 0.01      | 0.01      | 0.06      | 0.05      | 0.05      | 0.05      | 0.05      | 0.01      | 0.01      | 0.05       |
| TiO <sub>2</sub>                 | 0.13      | 0.12                        | 0.09      | 0.11      | 0.1       | 0.08      | 0.1       | 0.08      | 0.22      | 0.21      | 0.21      | 0.59       |
| LOI 1000                         | 3.83      | 4.92                        | 5.01      | 4.72      | 3.7       | 3.51      | 3.64      | 3.73      | 3.2       | 4         | 4.14      | 2.17       |
| Total                            | 100.49    | 100.11                      | 99.87     | 99.85     | 100       | 100.1     | 100.08    | 99.99     | 99.5      | 100.51    | 100.2     | 99.81      |
| Li                               | 2.12      | 4.27                        | 5.23      | 5.15      | 7.72      | 3.97      | 5.35      | 3.21      | 3.95      | 5.19      | 5.64      | 8.01       |
| Be                               | 0.11      | 0.11                        | 0.1       | 0.1       | 0.07      | 0.1       | 0.14      | 0.09      | 0.16      | 0.34      | 0.41      | 0.25       |
| Sc                               | 40        | 42                          | 48        | 40        | 51        | 53        | 43        | 34        | 48        | 34        | 41        | 37         |
| Ti                               | 890       | 793                         | 605       | 730       | 646       | 586       | 695       | 503       | 1482      | 1205      | 1410      | 4039       |
| V                                | 187       | 198                         | 177       | 177       | 215       | 197       | 203       | 144       | 470       | 207       | 236       | 243        |
| Mn                               | 1069      | 1025                        | 1122      | 1117      | 1254      | 1588      | 1520      | 1076      | 930       | 1411      | 1283      | 1319       |
| Co                               | 35        | 42                          | 40        | 41        | 49        | 59        | 52        | 39        | 49        | 38        | 38        | 36         |
| Ni                               | 227       | 271                         | 248       | 251       | 250       | 110       | 101       | 105       | 50        | 181       | 167       | 107        |
| Cu                               | 4.46      | 4.99                        | 5.68      | 5.36      | 44        | 1.09      | 1         | 1.62      | 1.08      | 1.54      | 2.08      | 103        |
| Zn                               | 17.89     | 20.5                        | 23.8      | 23.8      | 47        | 45        | 37        | 25.7      | 17.43     | 47        | 42        | 60         |
| Ga                               | 9.11      | 9.21                        | 10.64     | 9.67      | 10.29     | 10.7      | 11.98     | 11.62     | 13.15     | 8.68      | 8.38      | 12.36      |
| As                               | 10.13     | 9.92                        | 10.02     | 9.96      | 9.82      | 9.58      | 9.16      | 9.67      | 9.6       | 8.4       | 9         | 9.63       |
| Se                               | 0.13      | 0.1                         | 0.13      | 0.18      | 0.07      | 0.08      | 0.1       | 0.14      | 0.01      | 0.19      | 0.14      | 0.37       |
| Rb                               | 0.56      | 0.32                        | 0.58      | 0.37      | 2.82      | 20.3      | 20.6      | 15.28     | 8.31      | 0.3       | 0.27      | 18.5       |
| Sr                               | 12.35     | 12.59                       | 22.7      | 19.1      | 566       | 350       | 419       | 356       | 371       | 18.33     | 15.08     | 351        |

|            |        |        |        |        |        |        |        |       |        |       |       |       |
|------------|--------|--------|--------|--------|--------|--------|--------|-------|--------|-------|-------|-------|
| <b>Y</b>   | 4.86   | 6.25   | 3.57   | 4.13   | 3.08   | 5.28   | 4.65   | 4.01  | 4.4    | 18.54 | 8.85  | 16.32 |
| <b>Zr</b>  | 5.27   | 7.02   | 4.1    | 4.58   | 2.37   | 11.41  | 10.57  | 12.49 | 8.15   | 18.63 | 18.61 | 36    |
| <b>Nb</b>  | 0.3    | 0.49   | 0.22   | 0.31   | 0.1    | 0.37   | 0.37   | 0.45  | 0.37   | 1.38  | 1.42  | 0.86  |
| <b>Cs</b>  | 0.05   | 0.05   | 0.05   | 0.05   | 1.7    | 0.19   | 0.12   | 0.12  | 0.14   | 0.08  | 0.04  | 0.19  |
| <b>Ba</b>  | 4.19   | 4.46   | 6.15   | 7.77   | 402    | 82     | 95     | 58    | 62     | 5.66  | 5.96  | 327   |
| <b>La</b>  | 1.1    | 1.51   | 0.81   | 1.23   | 0.57   | 1.02   | 1.02   | 1.25  | 1.25   | 3.27  | 2.16  | 2.05  |
| <b>Ce</b>  | 2.38   | 3.45   | 1.58   | 2.51   | 0.95   | 2.22   | 2.18   | 2.44  | 2.29   | 6.59  | 4.14  | 5.16  |
| <b>Pr</b>  | 0.28   | 0.43   | 0.18   | 0.28   | 0.13   | 0.3    | 0.29   | 0.29  | 0.26   | 0.77  | 0.43  | 0.85  |
| <b>Nd</b>  | 1.31   | 1.86   | 0.83   | 1.22   | 0.63   | 1.45   | 1.37   | 1.28  | 1.17   | 3.34  | 1.78  | 4.71  |
| <b>Sm</b>  | 0.36   | 0.45   | 0.22   | 0.31   | 0.2    | 0.4    | 0.37   | 0.3   | 0.28   | 0.95  | 0.47  | 1.48  |
| <b>Eu</b>  | 0.13   | 0.18   | 0.09   | 0.17   | 0.13   | 0.19   | 0.2    | 0.15  | 0.15   | 0.34  | 0.2   | 0.54  |
| <b>Gd</b>  | 0.52   | 0.63   | 0.35   | 0.45   | 0.29   | 0.54   | 0.49   | 0.39  | 0.41   | 1.62  | 0.78  | 2.15  |
| <b>Tb</b>  | 0.1    | 0.12   | 0.07   | 0.08   | 0.06   | 0.1    | 0.09   | 0.07  | 0.08   | 0.34  | 0.16  | 0.37  |
| <b>Dy</b>  | 0.77   | 0.95   | 0.55   | 0.64   | 0.49   | 0.81   | 0.67   | 0.58  | 0.63   | 2.79  | 1.3   | 2.61  |
| <b>Ho</b>  | 0.18   | 0.23   | 0.13   | 0.15   | 0.12   | 0.18   | 0.16   | 0.14  | 0.16   | 0.68  | 0.32  | 0.57  |
| <b>Er</b>  | 0.53   | 0.71   | 0.41   | 0.46   | 0.37   | 0.6    | 0.51   | 0.44  | 0.52   | 2.13  | 1.02  | 1.62  |
| <b>Tm</b>  | 0.09   | 0.12   | 0.07   | 0.08   | 0.06   | 0.11   | 0.09   | 0.08  | 0.09   | 0.36  | 0.17  | 0.26  |
| <b>Yb</b>  | 0.62   | 0.85   | 0.49   | 0.53   | 0.45   | 0.73   | 0.61   | 0.54  | 0.68   | 2.55  | 1.24  | 1.66  |
| <b>Lu</b>  | 0.1    | 0.13   | 0.08   | 0.08   | 0.07   | 0.12   | 0.1    | 0.09  | 0.12   | 0.4   | 0.2   | 0.25  |
| <b>Hf</b>  | 0.17   | 0.21   | 0.13   | 0.14   | 0.08   | 0.31   | 0.3    | 0.31  | 0.23   | 0.73  | 0.63  | 1.02  |
| <b>Ta</b>  | <0.000 | <0.000 | <0.000 | <0.000 | <0.000 | <0.000 | <0.000 | 0.02  | <0.000 | 0.08  | 0.1   | 0.02  |
| <b>Pb</b>  | 0.42   | 0.3    | 0.55   | 0.83   | 0.27   | 0.71   | 0.78   | 0.6   | 0.97   | 0.43  | 0.27  | 0.86  |
| <b>Th</b>  | 0.13   | 0.15   | 0.09   | 0.05   | <0.000 | 0.11   | 0.12   | 0.26  | 0.21   | 0.58  | 0.45  | 0.15  |
| <b>U</b>   | 0.05   | 0.07   | 0.07   | 0.07   | 0.04   | 0.08   | 0.06   | 0.14  | 0.1    | 0.21  | 0.17  | 0.1   |
| <b>Mg#</b> | 77.90  | 79.19  | 77.46  | 78.54  | 73.57  | 69.63  | 69.42  | 71.60 | 58.54  | 76.19 | 75.80 | 68.23 |
| <b>δEu</b> | 0.92   | 1.03   | 0.99   | 1.39   | 1.65   | 1.25   | 1.44   | 1.34  | 1.35   | 0.83  | 1.00  | 0.92  |

Table S2. *Cont.*

| Location                         | Lanong Ophiolitic Fragments |            |            |             |             |             | Dongco Ophiolitic Fragments |             |             |             |             |             |                 |
|----------------------------------|-----------------------------|------------|------------|-------------|-------------|-------------|-----------------------------|-------------|-------------|-------------|-------------|-------------|-----------------|
| Data Sources                     | This Study                  |            |            |             |             |             |                             |             |             |             |             |             | References [12] |
| Rock Type                        | Gabbro                      | Gabbro     | Gabbro     | Anorthosite | Anorthosite | Anorthosite | Anorthosite                 | Anorthosite | Anorthosite | Anorthosite | Anorthosite | Anorthosite | Gabbro          |
| Sample Name                      | 16XBLN02-2                  | 16XBLN02-3 | 16XBLN02-4 | 16XLN03-1   | 16XLN03-6   | XDC01       | XDC03                       | XDC04       | XDC05       | XDC06       | XDC07       | XDC08       | 11DC-1          |
| Al <sub>2</sub> O <sub>3</sub>   | 15.94                       | 15.44      | 15.8       | 24.4        | 23.74       | 30.71       | 30.56                       | 30.8        | 30.29       | 30.77       | 31.32       | 30.01       | 17.56           |
| BaO                              | 0.04                        | 0.04       | 0.04       | 0.01        | 0.01        | 0.01        | 0.02                        | 0.01        | 0.01        | 0.01        | 0.01        | 0.01        |                 |
| CaO                              | 8.98                        | 10.2       | 10.1       | 24          | 20.8        | 15.7        | 15.8                        | 16.25       | 16.9        | 16.35       | 16.3        | 16.3        | 16.42           |
| Cr <sub>2</sub> O <sub>3</sub>   | 0.02                        | 0.03       | 0.03       | 0.01        | 0.01        | 0.01        | 0.01                        | 0.01        | 0.01        | 0.01        | 0.01        | 0.01        |                 |
| Fe <sub>2</sub> O <sub>3</sub> T | 8.95                        | 8.07       | 8.21       | 1.8         | 2.86        | 1.02        | 1.08                        | 1.14        | 0.8         | 0.99        | 0.73        | 1.32        | 3.87            |
| K <sub>2</sub> O                 | 0.87                        | 0.86       | 0.81       | 0.16        | 0.01        | 0.12        | 0.08                        | 0.13        | 0.14        | 0.14        | 0.11        | 0.11        | 0.21            |
| MgO                              | 7.18                        | 8.07       | 7.75       | 2.53        | 6.2         | 0.64        | 0.95                        | 0.44        | 0.39        | 0.35        | 0.3         | 0.74        | 10.36           |
| MnO                              | 0.17                        | 0.15       | 0.18       | 0.06        | 0.07        | 0.03        | 0.04                        | 0.05        | 0.04        | 0.04        | 0.04        | 0.04        | 0.07            |
| Na <sub>2</sub> O                | 3.38                        | 3.08       | 3.12       | 0.07        | 0.01        | 2.33        | 2.36                        | 2.23        | 2.29        | 2.37        | 2.34        | 2.27        | 0.98            |
| P <sub>2</sub> O <sub>5</sub>    | 0.06                        | 0.04       | 0.04       | <0.01       | <0.01       | 0.01        | 0.01                        | 0.01        | 0.01        | 0.01        | 0.01        | 0.01        | 0.01            |
| SiO <sub>2</sub>                 | 51.46                       | 51.2       | 51.2       | 42.2        | 40.4        | 47.09       | 47.4                        | 47.05       | 47.43       | 47.71       | 47.79       | 47.4        | 48.4            |
| SrO                              | 0.05                        | 0.05       | 0.05       | 0.01        | 0.01        | 0.04        | 0.04                        | 0.04        | 0.04        | 0.04        | 0.04        | 0.04        |                 |
| TiO <sub>2</sub>                 | 0.7                         | 0.55       | 0.58       | 0.01        | 0.01        | 0.02        | 0.04                        | 0.02        | 0.02        | 0.02        | 0.02        | 0.03        | 0.14            |
| LOI 1000                         | 2.34                        | 2.32       | 2.37       | 5.05        | 6.39        | 2.03        | 1.74                        | 1.96        | 2.06        | 1.92        | 1.64        | 1.84        | 1.95            |
| Total                            | 100.14                      | 100.1      | 100.28     | 100.31      | 100.52      | 99.74       | 100.11                      | 100.12      | 100.42      | 100.72      | 100.64      | 100.1       | 99.97           |
| Li                               | 7.12                        | 6.93       | 8.21       | 3.92        | 14.76       | 6.07        | 0.86                        | 2.73        | 0.1         | 0.04        | 0.1         | 0.21        |                 |
| Be                               | 0.27                        | 0.22       | 0.22       | 0.03        | 0.05        | 0.14        | 0.13                        | 0.15        | 0.13        | 0.15        | 0.11        | 0.15        |                 |
| Sc                               | 34                          | 37         | 35         | 5.63        | 6.44        | 0.24        | 0.96                        | 0.39        | 0.29        | 0.25        | 0.19        | 0.79        | 49.1            |
| Ti                               | 4576                        | 3619       | 3747       | 74          | 103         | 161         | 313                         | 166         | 161         | 154         | 156         | 231         |                 |
| V                                | 251                         | 225        | 224        | 25.1        | 27          | 3.4         | 10.21                       | 4.25        | 3.89        | 3.68        | 3.1         | 7.12        | 91              |
| Mn                               | 1366                        | 1237       | 1370       | 487         | 518         | 213         | 301                         | 329         | 271         | 270         | 262         | 259         |                 |
| Co                               | 34                          | 35         | 35         | 7.4         | 17.18       | 2.66        | 4.26                        | 2.27        | 1.64        | 1.52        | 1.46        | 3.44        | 28              |
| Ni                               | 101                         | 109        | 105        | 84          | 142         | 8.37        | 18.25                       | 8.22        | 5.77        | 4.18        | 8           | 12.25       | 107.1           |
| Cu                               | 63                          | 93         | 101        | 2.84        | 3.43        | 3.31        | 3.41                        | 5.45        | 3.55        | 3.41        | 2.44        | 2.98        | 4.6             |
| Zn                               | 64                          | 55         | 57         | 7.44        | 14.91       | 5.61        | 4.48                        | 3.64        | 4.78        | 3.17        | 2.56        | 3.7         | 19.5            |
| Ga                               | 12.96                       | 11.7       | 11.86      | 8.12        | 8.73        | 11.24       | 11.37                       | 10.9        | 10.49       | 10.5        | 10.59       | 10.76       | 8.9             |
| As                               | 9.35                        | 9.53       | 9.86       | 9.81        | 10.14       | 10.58       | 10.2                        | 10.72       | 10.75       | 10.73       | 10.29       | 9.84        |                 |
| Se                               | 0.53                        | 0.4        | 0.56       | 0.04        | 0.06        | 0.09        | 0.07                        | 0.04        | 0.07        | 0.02        | 0.04        | 0.11        |                 |
| Rb                               | 17.01                       | 17.19      | 17.79      | 2           | 0.26        | 3.59        | 2.07                        | 2.1         | 2.34        | 2.31        | 1.62        | 1.89        | 3.88            |
| Sr                               | 342                         | 335        | 337        | 96          | 24.6        | 205         | 198                         | 204         | 186         | 204         | 184         | 174         | 92              |
| Y                                | 18.01                       | 14.7       | 15.05      | 0.65        | 0.65        | 0.77        | 1.58                        | 0.74        | 0.64        | 0.66        | 0.61        | 1.09        | 3.97            |
| Zr                               | 45                          | 31         | 33         | 0.71        | 0.51        | 8.74        | 7.47                        | 6.06        | 7.88        | 9.63        | 7.75        | 8.51        | 3.8             |
| Nb                               | 1.03                        | 0.73       | 0.81       | 0.05        | 0.04        | 0.1         | 0.14                        | 0.12        | 0.1         | 0.11        | 0.08        | 0.11        | 0.08            |
| Cs                               | 0.24                        | 0.19       | 0.21       | 0.21        | 0.08        | 0.14        | 0.08                        | 0.15        | 0.12        | 0.13        | 0.07        | 0.08        | 3.78            |
| Ba                               | 314                         | 328        | 273        | 43          | 17.86       | 32          | 25.2                        | 19.91       | 14.03       | 14.01       | 13.28       | 15.64       | 45.1            |

|                 |       |       |       |        |        |        |        |        |        |        |        |        |       |
|-----------------|-------|-------|-------|--------|--------|--------|--------|--------|--------|--------|--------|--------|-------|
| La              | 2.38  | 1.79  | 1.92  | 0.23   | 0.3    | 0.74   | 0.78   | 0.62   | 0.56   | 0.61   | 0.56   | 0.65   | 0.25  |
| Ce              | 6.23  | 4.75  | 4.93  | 0.4    | 0.51   | 1.38   | 1.54   | 1.28   | 1.12   | 1.23   | 1.13   | 1.35   | 0.76  |
| Pr              | 1     | 0.76  | 0.8   | 0.05   | 0.06   | 0.17   | 0.19   | 0.15   | 0.14   | 0.15   | 0.14   | 0.17   | 0.14  |
| Nd              | 5.51  | 4.28  | 4.39  | 0.24   | 0.26   | 0.77   | 0.91   | 0.67   | 0.61   | 0.63   | 0.64   | 0.78   | 0.78  |
| Sm              | 1.76  | 1.38  | 1.45  | 0.05   | 0.06   | 0.14   | 0.21   | 0.13   | 0.12   | 0.12   | 0.11   | 0.16   | 0.34  |
| Eu              | 0.7   | 0.53  | 0.52  | 0.09   | 0.07   | 0.25   | 0.27   | 0.25   | 0.23   | 0.25   | 0.24   | 0.25   | 0.18  |
| Gd              | 2.46  | 1.95  | 1.94  | 0.07   | 0.07   | 0.13   | 0.24   | 0.13   | 0.11   | 0.12   | 0.11   | 0.19   | 0.5   |
| Tb              | 0.43  | 0.34  | 0.36  | 0.01   | 0.01   | 0.02   | 0.04   | 0.02   | 0.01   | 0.02   | 0.02   | 0.03   | 0.1   |
| Dy              | 3     | 2.42  | 2.52  | 0.1    | 0.08   | 0.11   | 0.25   | 0.11   | 0.1    | 0.11   | 0.1    | 0.18   | 0.72  |
| Ho              | 0.65  | 0.52  | 0.53  | 0.02   | 0.02   | 0.02   | 0.05   | 0.02   | 0.02   | 0.02   | 0.02   | 0.04   | 0.16  |
| Er              | 1.85  | 1.52  | 1.53  | 0.07   | 0.07   | 0.07   | 0.16   | 0.06   | 0.06   | 0.06   | 0.05   | 0.11   | 0.44  |
| Tm              | 0.29  | 0.24  | 0.24  | 0.01   | 0.01   | 0.01   | 0.03   | 0.01   | 0.01   | 0.01   | 0.01   | 0.02   | 0.06  |
| Yb              | 1.84  | 1.5   | 1.55  | 0.07   | 0.08   | 0.07   | 0.16   | 0.07   | 0.06   | 0.07   | 0.06   | 0.11   | 0.42  |
| Lu              | 0.28  | 0.22  | 0.24  | 0.01   | 0.01   | 0.01   | 0.03   | 0.01   | 0.01   | 0.01   | 0.01   | 0.02   | 0.06  |
| Hf              | 1.25  | 0.93  | 0.96  | 0.02   | 0.02   | 0.19   | 0.2    | 0.14   | 0.19   | 0.23   | 0.18   | 0.2    | 0.14  |
| Ta              | 0.03  | 0.01  | 0.02  | <0.000 | <0.000 | <0.000 | <0.000 | <0.000 | <0.000 | <0.000 | <0.000 | <0.000 | 0.01  |
| Pb              | 0.64  | 0.3   | 0.79  | 0.6    | 0.67   | 1.02   | 0.8    | 0.98   | 0.54   | 0.45   | 0.37   | 0.31   | 0.93  |
| Th              | 0.2   | 0.1   | 0.13  | <0.000 | <0.000 | <0.000 | <0.000 | <0.000 | <0.000 | <0.000 | <0.000 | <0.000 | 0.03  |
| U               | 0.12  | 0.04  | 0.06  | 0.02   | 0.03   | 0.05   | 0.05   | 0.03   | 0.04   | 0.01   | 0.02   | 0.01   | 0.01  |
| Mg <sup>#</sup> | 65.15 | 69.97 | 68.75 | 76.61  | 83.48  | 59.39  | 67.21  | 47.35  | 53.19  | 45.17  | 48.92  | 56.64  | 86.19 |
| δEu             | 1.03  | 0.99  | 0.95  | 4.65   | 3.29   | 5.57   | 3.66   | 5.82   | 6.01   | 6.3    | 6.6    | 4.38   | 1.34  |

Table 2. *Cont.*

| Location                         |        | Dong            |        |        |        |         |         |         |         | Standards Rocks |                  |            |                  |
|----------------------------------|--------|-----------------|--------|--------|--------|---------|---------|---------|---------|-----------------|------------------|------------|------------------|
| Data Sources                     |        | References [12] |        |        |        |         |         |         |         |                 |                  |            |                  |
| Rock Type                        | Gabbro | Gabbro          | Gabbro | Gabbro | Gabbro | Gabbro  | Gabbro  | Gabbro  | Gabbro  |                 |                  |            |                  |
| Sample Name                      | 11DC-3 | 11DC-4          | 11DC-6 | 11DC-7 | 11DC-8 | 11DC-16 | 11DC-37 | 11DC-38 | 11DC-39 | GBW07105        | Reference Values | NCSDC47009 | Reference Values |
| Al <sub>2</sub> O <sub>3</sub>   | 15.43  | 26.71           | 16.12  | 18.69  | 18.99  | 16.36   | 15.66   | 15.65   | 22.23   | 13.76           | 13.83            | 2.51       | 2.49             |
| BaO                              |        |                 |        |        |        |         |         |         |         | 0.07            | 0.06             | 0.15       | 0.15             |
| CaO                              | 19.55  | 17.56           | 12.28  | 15.3   | 18.92  | 11.43   | 11.29   | 11.27   | 17.44   | 8.75            | 8.81             | 19.75      | 19.80            |
| Cr <sub>2</sub> O <sub>3</sub>   |        |                 |        |        |        |         |         |         |         | 0.02            | 0.02             | <0.01      | 0.00             |
| Fe <sub>2</sub> O <sub>3</sub> T | 3.15   | 1.93            | 8.2    | 4.02   | 2.29   | 8.33    | 9.94    | 10      | 2.89    | 13.17           | 13.40            | 2.88       | 2.96             |
| K <sub>2</sub> O                 | 0.02   | 0.02            | 0.18   | 0.11   | 0.3    | 0.23    | 0.11    | 0.12    | 0.07    | 2.30            | 2.32             | 0.70       | 0.70             |
| MgO                              | 10.42  | 5.3             | 8.63   | 11.71  | 8.72   | 8.44    | 7.75    | 8.59    | 6.36    | 7.69            | 7.77             | 3.75       | 3.82             |
| MnO                              | 0.07   | 0.03            | 0.14   | 0.07   | 0.05   | 0.14    | 0.15    | 0.14    | 0.06    | 0.18            | 0.17             | 20.40      | 20.30            |
| Na <sub>2</sub> O                | 0.64   | 0.91            | 1.8    | 0.73   | 0.85   | 2.31    | 2.21    | 2.05    | 1.33    | 3.37            | 3.38             | 0.03       | 0.04             |
| P <sub>2</sub> O <sub>5</sub>    | 0.01   | 0.01            | 0.02   | 0.01   | 0.01   | 0.02    | 0.05    | 0.04    | 0.01    | 0.99            | 0.95             | 0.14       | 0.14             |
| SiO <sub>2</sub>                 | 49.44  | 46.14           | 50.37  | 46.43  | 48.09  | 50.99   | 50.21   | 49.75   | 48.03   | 44.22           | 44.64            | 15.84      | 15.82            |
| SrO                              |        |                 |        |        |        |         |         |         |         | 0.14            | 0.13             | 0.04       | 0.00             |
| TiO <sub>2</sub>                 | 0.11   | 0.04            | 0.38   | 0.06   | 0.07   | 0.41    | 0.84    | 0.85    | 0.14    | 2.34            | 2.37             | 0.15       | 0.15             |
| LOI 1000                         | 1.16   | 1.33            | 0.94   | 2.87   | 1.71   | 1.32    | 1.76    | 1.52    | 1.43    |                 |                  |            |                  |
| Total                            | 100    | 99.98           | 99.06  | 100    | 99.99  | 99.98   | 99.97   | 99.98   | 99.98   |                 |                  |            |                  |
| Li                               |        |                 |        |        |        |         |         |         |         |                 |                  |            |                  |
| Be                               |        |                 |        |        |        |         |         |         |         |                 |                  |            |                  |
| Sc                               | 60     | 21              | 37.6   | 30.5   | 49.2   | 38.8    | 39.3    | 40.6    | 43.1    |                 |                  |            |                  |
| Ti                               |        |                 |        |        |        |         |         |         |         |                 |                  |            |                  |
| V                                | 100    | 47              | 203    | 80     | 85     | 223     | 258     | 269     | 90      |                 |                  |            |                  |
| Mn                               |        |                 |        |        |        |         |         |         |         |                 |                  |            |                  |
| Co                               | 23     | 14.1            | 36.4   | 33.4   | 19     | 36.9    | 38.1    | 40.1    | 16.1    |                 |                  |            |                  |
| Ni                               | 92.8   | 90              | 90.4   | 213    | 95     | 89      | 84.4    | 94.2    | 59.7    |                 |                  |            |                  |
| Cu                               | 3.62   | 17              | 12.5   | 43.1   | 10.7   | 20      | 15.8    | 35.7    | 93.2    |                 |                  |            |                  |
| Zn                               | 16.9   | 13.3            | 45.1   | 23.1   | 13.8   | 47.1    | 47.3    | 47.3    | 19.8    |                 |                  |            |                  |
| Ga                               | 7.41   | 10.7            | 12     | 8.25   | 8.26   | 12.11   | 14.31   | 14.01   | 10.31   |                 |                  |            |                  |
| As                               |        |                 |        |        |        |         |         |         |         |                 |                  |            |                  |
| Se                               |        |                 |        |        |        |         |         |         |         |                 |                  |            |                  |
| Rb                               | 0.26   | 0.18            | 2.12   | 2.36   | 2.67   | 3.33    | 1.47    | 1.29    | 1.96    |                 |                  |            |                  |
| Sr                               | 67.2   | 96.7            | 75.5   | 52.7   | 116    | 91.5    | 155     | 117     | 169     |                 |                  |            |                  |
| Y                                | 3.29   | 1.27            | 11.1   | 2.21   | 2.05   | 12.1    | 20      | 19.5    | 3.6     |                 |                  |            |                  |
| Zr                               | 1.96   | 0.7             | 17.7   | 0.65   | 0.89   | 20.5    | 49.7    | 44.5    | 2.7     |                 |                  |            |                  |



|            |       |       |       |       |       |       |      |       |       |
|------------|-------|-------|-------|-------|-------|-------|------|-------|-------|
| <b>Nb</b>  | 0.02  | 0.02  | 0.45  | 0.02  | 0.02  | 0.5   | 1.07 | 0.76  | 0.03  |
| <b>Cs</b>  | 0.25  | 0.19  | 1.97  | 2.45  | 0.52  | 2.58  | 0.17 | 1.12  | 0.31  |
| <b>Ba</b>  | 4.43  | 3.49  | 32.8  | 9.8   | 5.5   | 40.2  | 14.9 | 14    | 10.8  |
| <b>La</b>  | 0.12  | 0.06  | 0.95  | 0.06  | 0.07  | 1.02  | 2    | 1.71  | 0.16  |
| <b>Ce</b>  | 0.36  | 0.2   | 2.6   | 0.19  | 0.22  | 2.74  | 5.85 | 5     | 0.55  |
| <b>Pr</b>  | 0.07  | 0.04  | 0.45  | 0.04  | 0.04  | 0.44  | 1.01 | 0.92  | 0.11  |
| <b>Nd</b>  | 0.39  | 0.17  | 2.38  | 0.2   | 0.22  | 2.49  | 5.53 | 4.95  | 0.69  |
| <b>Sm</b>  | 0.21  | 0.08  | 0.93  | 0.13  | 0.13  | 0.89  | 1.9  | 1.8   | 0.29  |
| <b>Eu</b>  | 0.12  | 0.09  | 0.36  | 0.09  | 0.08  | 0.37  | 0.7  | 0.7   | 0.22  |
| <b>Gd</b>  | 0.37  | 0.14  | 1.32  | 0.24  | 0.25  | 1.35  | 2.62 | 2.53  | 0.49  |
| <b>Tb</b>  | 0.08  | 0.03  | 0.25  | 0.05  | 0.05  | 0.27  | 0.48 | 0.47  | 0.09  |
| <b>Dy</b>  | 0.57  | 0.22  | 1.81  | 0.36  | 0.38  | 1.97  | 3.35 | 3.23  | 0.64  |
| <b>Ho</b>  | 0.14  | 0.05  | 0.43  | 0.09  | 0.08  | 0.48  | 0.75 | 0.75  | 0.14  |
| <b>Er</b>  | 0.37  | 0.14  | 1.24  | 0.26  | 0.24  | 1.34  | 2.13 | 2.14  | 0.36  |
| <b>Tm</b>  | 0.05  | 0.02  | 0.19  | 0.03  | 0.03  | 0.19  | 0.32 | 0.32  | 0.05  |
| <b>Yb</b>  | 0.34  | 0.11  | 1.29  | 0.23  | 0.2   | 1.32  | 2.12 | 2.04  | 0.3   |
| <b>Lu</b>  | 0.05  | 0.02  | 0.19  | 0.04  | 0.03  | 0.21  | 0.32 | 0.31  | 0.05  |
| <b>Hf</b>  | 0.11  | 0.03  | 0.53  | 0.04  | 0.05  | 0.62  | 1.31 | 1.25  | 0.13  |
| <b>Ta</b>  | 0.01  | 0     | 0.03  | 0     | 0     | 0.04  | 0.08 | 0.06  | 0.01  |
| <b>Pb</b>  | 0.21  | 0.2   | 0.23  | 0.64  | 0.66  | 1.09  | 0.36 | 1.45  | 0.84  |
| <b>Th</b>  | 0.01  | 0.01  | 0.14  | 0.01  | 0.01  | 0.16  | 0.24 | 0.19  | 0.01  |
| <b>U</b>   | 0.01  | 0     | 0.06  | 0     | 0     | 0.07  | 0.09 | 0.1   | 0     |
| <b>Mg#</b> | 88.52 | 86.49 | 71.04 | 87.16 | 89.87 | 70.25 | 64.5 | 66.69 | 83.68 |
| <b>δEu</b> | 1.3   | 2.53  | 1     | 1.55  | 1.43  | 1.04  | 0.95 | 1     | 1.74  |

---

Table 2. *Cont.*

| Data Sources                     |        |                  |        |                  | standards rocks |                  |           |                  |           |                  |         |                  |
|----------------------------------|--------|------------------|--------|------------------|-----------------|------------------|-----------|------------------|-----------|------------------|---------|------------------|
| Sample Name                      | SARM-4 | Reference Values | SARM-5 | Reference Values | AGV-2           | Reference Values | BCR-2     | Reference Values | BHVO-2    | Reference Values | GSP-2   | Reference Values |
| Al <sub>2</sub> O <sub>3</sub>   | 16.52  | 16.50            | 4.12   | 4.18             |                 |                  |           |                  |           |                  |         |                  |
| BaO                              | 0.01   | 0.01             | 0.01   | 0.01             |                 |                  |           |                  |           |                  |         |                  |
| CaO                              | 11.40  | 11.50            | 2.62   | 2.66             |                 |                  |           |                  |           |                  |         |                  |
| Cr <sub>2</sub> O <sub>3</sub>   | 0.01   | 0.00             | 3.49   | 3.58             |                 |                  |           |                  |           |                  |         |                  |
| Fe <sub>2</sub> O <sub>3</sub> T | 8.98   | 8.97             | 12.74  | 12.70            |                 |                  |           |                  |           |                  |         |                  |
| K <sub>2</sub> O                 | 0.24   | 0.25             | 0.08   | 0.09             |                 |                  |           |                  |           |                  |         |                  |
| MgO                              | 7.54   | 7.50             | 25.60  | 25.30            |                 |                  |           |                  |           |                  |         |                  |
| MnO                              | 0.19   | 0.18             | 0.23   | 0.22             |                 |                  |           |                  |           |                  |         |                  |
| Na <sub>2</sub> O                | 2.46   | 2.46             | 0.41   | 0.37             |                 |                  |           |                  |           |                  |         |                  |
| P <sub>2</sub> O <sub>5</sub>    | 0.01   | 0.01             | 0.01   | 0.02             |                 |                  |           |                  |           |                  |         |                  |
| SiO <sub>2</sub>                 | 52.61  | 52.64            | 51.14  | 51.10            |                 |                  |           |                  |           |                  |         |                  |
| SrO                              | 0.04   | 0.03             | 0.01   | 0.00             |                 |                  |           |                  |           |                  |         |                  |
| TiO <sub>2</sub>                 | 0.18   | 0.20             | 0.18   | 0.20             |                 |                  |           |                  |           |                  |         |                  |
| LOI 1000                         |        |                  |        |                  |                 |                  |           |                  |           |                  |         |                  |
| Total                            |        |                  |        |                  |                 |                  |           |                  |           |                  |         |                  |
| Li                               |        |                  |        |                  | 10.94           | 11.00            | 9.22      | 9.00             | 4.47      | 4.80             | 36.02   | 36.00            |
| Be                               |        |                  |        |                  | 2.50            | 2.30             | 2.95      |                  | 1.14      | 1.00             | 1.58    | 1.50             |
| Sc                               |        |                  |        |                  | 13.41           | 13.00            | 32.35     | 33.00            | 31.11     | 32.00            | 9.65    | 7.00             |
| Ti                               |        |                  |        |                  | 6640.62         | 6294.00          | 14,571.41 | 13,845.00        | 17,775.60 | 16,602.00        | 4204.98 | 4076.00          |
| V                                |        |                  |        |                  | 112.97          | 122.00           | 403.68    | 416.00           | 308.57    | 317.00           | 48.63   | 50.00            |
| Mn                               |        |                  |        |                  | 808.53          | 775.00           | 1611.43   | 1626.00          | 1386.54   | 1356.00          | 328.96  | 264.00           |
| Co                               |        |                  |        |                  | 15.87           | 16.00            | 38.08     | 37.00            | 45.55     | 45.00            | 7.17    | 7.30             |
| Ni                               |        |                  |        |                  | 20.24           | 20.00            | 14.29     | 18.00            | 127.98    | 119.00           | 18.42   | 17.00            |
| Cu                               |        |                  |        |                  | 53.13           | 53.00            | 18.55     | 21.00            | 134.23    | 127.00           | 45.95   | 46.00            |
| Zn                               |        |                  |        |                  | 94.36           | 86.00            | 139.91    | 127.00           | 105.19    | 103.00           | 118.07  | 120.00           |
| Ga                               |        |                  |        |                  | 21.15           | 21.00            | 22.20     | 23.00            | 20.79     | 22.00            | 42.45   | 24.00            |
| As                               |        |                  |        |                  | 11.01           |                  | 10.93     |                  | 10.58     |                  | 18.64   |                  |
| Se                               |        |                  |        |                  | 0.78            |                  | 1.05      |                  | 0.99      |                  | 1.72    |                  |
| Rb                               |        |                  |        |                  | 67.10           | 66.80            | 47.58     | 46.90            | 9.59      | 9.11             | 238.50  | 247.00           |
| Sr                               |        |                  |        |                  | 654.98          | 661.00           | 332.43    | 340.00           | 386.32    | 396.00           | 229.53  | 240.00           |
| Y                                |        |                  |        |                  | 19.92           | 20.00            | 35.49     | 37.00            | 25.85     | 26.00            | 26.54   | 28.00            |
| Zr                               |        |                  |        |                  | 225.36          | 230.00           | 178.07    | 184.00           | 165.15    | 172.00           | 568.09  | 550.00           |
| Nb                               |        |                  |        |                  | 13.81           | 14.50            | 11.88     | 12.60            | 17.92     | 18.10            | 25.73   | 27.00            |
| Cs                               |        |                  |        |                  | 1.18            | 1.20             | 1.13      | 1.10             | 0.10      | 0.10             | 1.19    | 1.20             |
| Ba                               |        |                  |        |                  | 1132.76         | 1130.00          | 667.39    | 677.00           | 129.29    | 131.00           | 1333.71 | 1340.00          |
| La                               |        |                  |        |                  | 37.80           | 37.90            | 24.76     | 24.90            | 15.00     | 15.20            | 179.51  | 180.00           |
| Ce                               |        |                  |        |                  | 69.57           | 68.60            | 52.62     | 52.90            | 37.43     | 37.50            | 433.63  | 440.00           |
| Pr                               |        |                  |        |                  | 8.27            | 8.15             | 6.78      | 6.70             | 5.25      | 5.35             | 55.54   | 56.00            |
| Nd                               |        |                  |        |                  | 32.14           | 30.50            | 30.02     | 28.70            | 25.97     | 24.50            | 220.78  | 212.00           |

|           |       |       |       |       |      |      |        |        |
|-----------|-------|-------|-------|-------|------|------|--------|--------|
| <b>Sm</b> | 5.43  | 5.49  | 6.50  | 6.58  | 6.08 | 6.07 | 25.51  | 27.00  |
| <b>Eu</b> | 1.53  | 1.53  | 1.95  | 1.96  | 2.09 | 2.07 | 2.26   | 2.30   |
| <b>Gd</b> | 4.58  | 4.52  | 6.62  | 6.75  | 6.16 | 6.24 | 12.76  | 13.00  |
| <b>Tb</b> | 0.64  | 0.64  | 1.01  | 1.07  | 0.92 | 0.92 | 1.46   | 1.25   |
| <b>Dy</b> | 3.50  | 3.47  | 6.27  | 6.41  | 5.36 | 5.31 | 5.89   | 6.10   |
| <b>Ho</b> | 0.66  | 0.68  | 1.27  | 1.28  | 0.99 | 0.98 | 0.96   | 1.00   |
| <b>Er</b> | 1.79  | 1.81  | 3.47  | 3.66  | 2.45 | 2.54 | 2.53   | 2.53   |
| <b>Tm</b> | 0.26  | 0.26  | 0.52  | 0.54  | 0.34 | 0.33 | 0.29   | 0.30   |
| <b>Yb</b> | 1.60  | 1.62  | 3.29  | 3.38  | 1.97 | 2.00 | 1.67   | 1.70   |
| <b>Lu</b> | 0.24  | 0.25  | 0.49  | 0.50  | 0.27 | 0.27 | 0.23   | 0.23   |
| <b>Hf</b> | 4.99  | 5.00  | 4.65  | 4.90  | 4.21 | 4.36 | 14.43  | 14.00  |
| <b>Ta</b> | 0.79  | 0.87  | 0.72  | 0.74  | 1.10 | 1.14 | 0.82   | 0.79   |
| <b>Pb</b> | 13.38 | 13.20 | 10.18 | 11.00 | 1.60 | 1.60 | 42.45  | 42.00  |
| <b>Th</b> | 5.90  | 6.10  | 5.61  | 5.70  | 1.07 | 1.22 | 107.66 | 105.00 |
| <b>U</b>  | 1.87  | 1.86  | 1.63  | 1.69  | 0.41 | 0.40 | 2.41   | 2.40   |

**Table S3.** Zircon U–Pb ages data of Dongco ophiolitic anorthosite (XDC08) and Lanong ophiolitic anorthosite (16XLN03-1) and gabbro (16XLN07-1).

| Sample Spot                                                  | Concentrations (ppm) |         |      | Isotopic Ratios                     |          |                                     |          | Isotopic Ages (Ma)                  |       |                                     |      |
|--------------------------------------------------------------|----------------------|---------|------|-------------------------------------|----------|-------------------------------------|----------|-------------------------------------|-------|-------------------------------------|------|
|                                                              | Th                   | U       | Th/U | <sup>207</sup> Pb/ <sup>235</sup> U | 1σ       | <sup>206</sup> Pb/ <sup>238</sup> U | 1σ       | <sup>207</sup> Pb/ <sup>235</sup> U | 1σ    | <sup>206</sup> Pb/ <sup>238</sup> U | 1σ   |
| XDC08, Dongco anorthosite (SIMS zircon U–Pb dating)          |                      |         |      |                                     |          |                                     |          |                                     |       |                                     |      |
| XDC08-01                                                     | 181.42               | 219.59  | 0.83 | 0.177250                            | 2.253151 | 0.025814                            | 1.500001 | 165.7                               | 3.45  | 164.3                               | 2.43 |
| XDC08-03                                                     | 116.70               | 145.59  | 0.80 | 0.177656                            | 2.808144 | 0.025532                            | 1.528053 | 166.0                               | 4.31  | 162.5                               | 2.45 |
| XDC08-05                                                     | 34.14                | 82.49   | 0.41 | 0.183139                            | 3.952626 | 0.025795                            | 1.611948 | 170.8                               | 6.23  | 164.2                               | 2.61 |
| XDC08-06                                                     | 258.97               | 299.09  | 0.87 | 0.179040                            | 2.028895 | 0.026219                            | 1.504742 | 167.2                               | 3.13  | 166.8                               | 2.48 |
| XDC08-07                                                     | 129.21               | 204.81  | 0.63 | 0.179046                            | 2.265463 | 0.026238                            | 1.500356 | 167.2                               | 3.50  | 167.0                               | 2.47 |
| XDC08-08                                                     | 174.53               | 278.59  | 0.63 | 0.188846                            | 3.348404 | 0.026523                            | 1.557463 | 175.6                               | 5.42  | 168.8                               | 2.59 |
| XDC08-09                                                     | 80.65                | 130.28  | 0.62 | 0.175706                            | 2.287407 | 0.026042                            | 1.505824 | 164.4                               | 3.48  | 165.7                               | 2.46 |
| XDC08-10                                                     | 153.89               | 274.67  | 0.56 | 0.182966                            | 2.092499 | 0.026285                            | 1.505298 | 170.6                               | 3.29  | 167.3                               | 2.49 |
| XDC08-11                                                     | 246.90               | 178.79  | 1.38 | 0.181863                            | 3.381810 | 0.025639                            | 1.566439 | 169.7                               | 5.30  | 163.2                               | 2.52 |
| XDC08-13                                                     | 400.85               | 337.42  | 1.19 | 0.177402                            | 2.463571 | 0.025663                            | 1.689691 | 165.8                               | 3.78  | 163.3                               | 2.73 |
| XDC08-15                                                     | 333.59               | 359.28  | 0.93 | 0.182208                            | 1.944637 | 0.026795                            | 1.525522 | 170.0                               | 3.05  | 170.5                               | 2.57 |
| XDC08-16                                                     | 209.03               | 387.13  | 0.54 | 0.183144                            | 1.808625 | 0.026802                            | 1.500202 | 170.8                               | 2.85  | 170.5                               | 2.52 |
| XDC08-17                                                     | 722.10               | 563.04  | 1.28 | 0.179628                            | 1.762587 | 0.026423                            | 1.562794 | 167.7                               | 2.73  | 168.1                               | 2.59 |
| XDC08-18                                                     | 89.07                | 170.06  | 0.52 | 0.180850                            | 2.119253 | 0.026836                            | 1.524270 | 168.8                               | 3.30  | 170.7                               | 2.57 |
| XDC08-20                                                     | 179.84               | 234.67  | 0.77 | 0.180659                            | 2.391929 | 0.026735                            | 1.502971 | 168.6                               | 3.72  | 170.1                               | 2.52 |
| XDC08-21                                                     | 711.55               | 565.92  | 1.26 | 0.182846                            | 1.715703 | 0.026562                            | 1.500279 | 170.5                               | 2.70  | 169.0                               | 2.50 |
| XDC08-23                                                     | 127.23               | 188.13  | 0.68 | 0.182094                            | 2.061459 | 0.026678                            | 1.501355 | 169.9                               | 3.23  | 169.7                               | 2.52 |
| XDC08-25                                                     | 47.44                | 73.04   | 0.65 | 0.177068                            | 3.267216 | 0.026106                            | 1.507985 | 165.5                               | 5.00  | 166.1                               | 2.47 |
| XDC08-26                                                     | 102.45               | 166.00  | 0.62 | 0.179493                            | 2.409826 | 0.025911                            | 1.500066 | 167.6                               | 3.73  | 164.9                               | 2.44 |
| XDC08-27                                                     | 379.85               | 475.15  | 0.80 | 0.178719                            | 1.746747 | 0.026383                            | 1.503917 | 167.0                               | 2.69  | 167.9                               | 2.49 |
| XDC08-28                                                     | 109.90               | 159.37  | 0.69 | 0.179796                            | 2.365112 | 0.026539                            | 1.509843 | 167.9                               | 3.67  | 168.8                               | 2.52 |
| XDC08-29                                                     | 69.34                | 137.19  | 0.51 | 0.179813                            | 2.247548 | 0.026737                            | 1.512460 | 167.9                               | 3.48  | 170.1                               | 2.54 |
| XDC08-30                                                     | 203.60               | 321.47  | 0.63 | 0.176127                            | 1.975883 | 0.025782                            | 1.507403 | 164.7                               | 3.01  | 164.1                               | 2.44 |
| XDC08-31                                                     | 148.76               | 298.10  | 0.50 | 0.180659                            | 2.167737 | 0.026090                            | 1.624153 | 168.6                               | 3.37  | 166.0                               | 2.66 |
| XDC08-32                                                     | 348.59               | 341.73  | 1.02 | 0.178570                            | 2.102591 | 0.026174                            | 1.561735 | 166.8                               | 3.24  | 166.6                               | 2.57 |
| 16XLN03-1, Lanong anorthosite (LA–ICP–MS zircon U–Pb dating) |                      |         |      |                                     |          |                                     |          |                                     |       |                                     |      |
| 16XLN03-1-01                                                 | 179.26               | 384.00  | 0.47 | 0.167922                            | 0.011749 | 0.026552                            | 0.000322 | 157.6                               | 10.21 | 168.9                               | 2.02 |
| 16XLN03-1-03                                                 | 322.19               | 568.61  | 0.57 | 0.180799                            | 0.005388 | 0.026704                            | 0.000321 | 168.7                               | 4.63  | 169.9                               | 2.02 |
| 16XLN03-1-04                                                 | 50.03                | 149.73  | 0.33 | 0.189580                            | 0.008868 | 0.026716                            | 0.000432 | 176.3                               | 7.57  | 170.0                               | 2.71 |
| 16XLN03-1-05                                                 | 1493.61              | 1174.98 | 1.27 | 0.178889                            | 0.007839 | 0.026321                            | 0.000241 | 167.1                               | 6.75  | 167.5                               | 1.51 |
| 16XLN03-1-06                                                 | 1346.46              | 1390.54 | 0.97 | 0.192252                            | 0.006123 | 0.026011                            | 0.000244 | 178.5                               | 5.22  | 165.5                               | 1.54 |
| 16XLN03-1-10                                                 | 261.96               | 453.82  | 0.58 | 0.168017                            | 0.006708 | 0.026114                            | 0.000240 | 157.7                               | 5.83  | 166.2                               | 1.51 |
| 16XLN03-1-11                                                 | 2572.46              | 2344.83 | 1.10 | 0.197838                            | 0.005301 | 0.026166                            | 0.000178 | 183.3                               | 4.50  | 166.5                               | 1.12 |

|                                                         |         |         |      |          |          |          |          |       |      |       |      |
|---------------------------------------------------------|---------|---------|------|----------|----------|----------|----------|-------|------|-------|------|
| 16XLN03-1-16                                            | 1844.17 | 2040.21 | 0.90 | 0.169018 | 0.005085 | 0.026226 | 0.000227 | 158.6 | 4.42 | 166.9 | 1.43 |
| 16XLN03-1-19                                            | 1285.89 | 1711.23 | 0.75 | 0.182034 | 0.004726 | 0.026156 | 0.000262 | 169.8 | 4.06 | 166.4 | 1.65 |
| 16XLN03-1-24                                            | 5092.74 | 3689.75 | 1.38 | 0.200108 | 0.004645 | 0.026431 | 0.000304 | 185.2 | 3.93 | 168.2 | 1.91 |
| 16XLN03-1-25                                            | 958.82  | 1178.85 | 0.81 | 0.180536 | 0.004877 | 0.025704 | 0.000296 | 168.5 | 4.20 | 163.6 | 1.86 |
| 16XLN03-1-27                                            | 971.44  | 1150.90 | 0.84 | 0.198014 | 0.004824 | 0.026293 | 0.000256 | 183.4 | 4.09 | 167.3 | 1.61 |
| 16XLN03-1-28                                            | 366.57  | 760.49  | 0.48 | 0.198073 | 0.005486 | 0.026158 | 0.000318 | 183.5 | 4.65 | 166.5 | 2.00 |
| 16XLN03-1-31                                            | 571.33  | 890.97  | 0.64 | 0.178246 | 0.004535 | 0.026093 | 0.000292 | 166.5 | 3.91 | 166.0 | 1.84 |
| 16XLN03-1-32                                            | 515.96  | 1007.55 | 0.51 | 0.180499 | 0.004449 | 0.025892 | 0.000346 | 168.5 | 3.83 | 164.8 | 2.18 |
| 16XLN07-1, Lanong gabbro (LA-ICP-MS zircon U-Pb dating) |         |         |      |          |          |          |          |       |      |       |      |
| 16XLN07-1-03                                            | 1346.36 | 1383.95 | 0.97 | 0.175374 | 0.003893 | 0.026031 | 0.000280 | 164.1 | 3.36 | 165.7 | 1.76 |
| 16XLN07-1-06                                            | 746.01  | 1441.77 | 0.52 | 0.187355 | 0.003877 | 0.027041 | 0.000251 | 174.4 | 3.32 | 172.0 | 1.58 |
| 16XLN07-1-08                                            | 2226.49 | 2089.92 | 1.07 | 0.182595 | 0.003650 | 0.026328 | 0.000261 | 170.3 | 3.14 | 167.5 | 1.64 |
| 16XLN07-1-09                                            | 3696.23 | 2650.87 | 1.39 | 0.177246 | 0.003227 | 0.026160 | 0.000233 | 165.7 | 2.79 | 166.5 | 1.47 |
| 16XLN07-1-10                                            | 1584.44 | 1436.05 | 1.10 | 0.182336 | 0.003955 | 0.026341 | 0.000225 | 170.1 | 3.40 | 167.6 | 1.41 |
| 16XLN07-1-11                                            | 3794.64 | 1381.72 | 2.75 | 0.183516 | 0.003902 | 0.026174 | 0.000261 | 171.1 | 3.35 | 166.6 | 1.64 |
| 16XLN07-1-12                                            | 980.12  | 1204.58 | 0.81 | 0.176945 | 0.003762 | 0.026294 | 0.000278 | 165.4 | 3.25 | 167.3 | 1.75 |
| 16XLN07-1-17                                            | 2022.03 | 1920.99 | 1.05 | 0.176160 | 0.004242 | 0.026375 | 0.000300 | 164.8 | 3.66 | 167.8 | 1.89 |
| 16XLN07-1-18                                            | 1697.92 | 1864.86 | 0.91 | 0.178308 | 0.004876 | 0.026072 | 0.000265 | 166.6 | 4.20 | 165.9 | 1.67 |
| 16XLN07-1-19                                            | 3138.16 | 709.00  | 4.43 | 0.177732 | 0.005082 | 0.026171 | 0.000294 | 166.1 | 4.38 | 166.5 | 1.85 |
| 16XLN07-1-22                                            | 2007.54 | 572.33  | 3.51 | 0.179664 | 0.005159 | 0.025983 | 0.000283 | 167.8 | 4.44 | 165.4 | 1.78 |
| 16XLN07-1-23                                            | 787.69  | 910.58  | 0.87 | 0.171442 | 0.004197 | 0.026038 | 0.000247 | 160.7 | 3.64 | 165.7 | 1.56 |
| 16XLN07-1-25                                            | 1213.05 | 1082.82 | 1.12 | 0.175514 | 0.004307 | 0.026080 | 0.000308 | 164.2 | 3.72 | 166.0 | 1.94 |
| 16XLN07-1-27                                            | 4053.07 | 1472.67 | 2.75 | 0.178544 | 0.003769 | 0.026937 | 0.000278 | 166.8 | 3.25 | 171.3 | 1.75 |
| 16XLN07-1-28                                            | 869.73  | 971.03  | 0.90 | 0.172466 | 0.004086 | 0.026259 | 0.000273 | 161.6 | 3.54 | 167.1 | 1.72 |

**Table S4.** Zircon Hf isotopic data of the anorthosite samples from the Dongco (XDC08) and Lanong (16XLN03-1) ophiolites.

| Samples                              | Age   | $^{176}\text{Yb}/^{177}\text{Hf}$ | 2 $\sigma$ | $^{176}\text{Lu}/^{177}\text{Hf}$ | 2 $\sigma$ | $^{176}\text{Hf}/^{177}\text{Hf}$ | 2 $\sigma$ | ( $^{176}\text{Hf}/^{177}\text{Hf}$ )i | $\epsilon\text{Hf(t)}$ | T <sub>DM1</sub> (Ma) | T <sub>DM2</sub> (Ma) |
|--------------------------------------|-------|-----------------------------------|------------|-----------------------------------|------------|-----------------------------------|------------|----------------------------------------|------------------------|-----------------------|-----------------------|
| XDC08, Dongco ophiolitic anorthosite |       |                                   |            |                                   |            |                                   |            |                                        |                        |                       |                       |
| XDC08-02                             | 163.6 | 0.044118                          | 0.000451   | 0.001797                          | 0.000016   | 0.283127                          | 0.000021   | 0.283121                               | 15.94                  | 180.3                 | 189.7                 |
| XDC08-06                             | 166.8 | 0.086875                          | 0.000050   | 0.003370                          | 0.000004   | 0.282954                          | 0.000017   | 0.282944                               | 9.73                   | 450.5                 | 591.0                 |
| XDC08-07                             | 167   | 0.066985                          | 0.000546   | 0.002569                          | 0.000013   | 0.283047                          | 0.000012   | 0.283039                               | 13.12                  | 302.5                 | 374.3                 |
| XDC08-09                             | 165.7 | 0.069702                          | 0.000899   | 0.002712                          | 0.000036   | 0.283114                          | 0.000012   | 0.283105                               | 15.43                  | 204.0                 | 224.1                 |
| XDC08-10                             | 167.3 | 0.106907                          | 0.000476   | 0.004267                          | 0.000018   | 0.282921                          | 0.000014   | 0.282907                               | 8.46                   | 514.4                 | 672.9                 |
| XDC08-11                             | 163.2 | 0.055883                          | 0.000759   | 0.002166                          | 0.000030   | 0.283000                          | 0.000013   | 0.282994                               | 11.43                  | 367.7                 | 479.5                 |
| XDC08-13                             | 163.3 | 0.091645                          | 0.000176   | 0.003505                          | 0.000004   | 0.282902                          | 0.000012   | 0.282891                               | 7.79                   | 532.3                 | 712.6                 |
| XDC08-15                             | 170.5 | 0.142389                          | 0.001320   | 0.005206                          | 0.000041   | 0.282899                          | 0.000016   | 0.282882                               | 7.63                   | 564.2                 | 728.1                 |
| XDC08-20                             | 170.1 | 0.083933                          | 0.000557   | 0.003176                          | 0.000011   | 0.282930                          | 0.000013   | 0.282919                               | 8.95                   | 485.0                 | 643.4                 |
| XDC08-21                             | 169   | 0.130530                          | 0.000145   | 0.004943                          | 0.000004   | 0.282921                          | 0.000014   | 0.282905                               | 8.42                   | 524.8                 | 676.9                 |
| XDC08-23                             | 169.7 | 0.074350                          | 0.000264   | 0.003004                          | 0.000014   | 0.282991                          | 0.000012   | 0.282982                               | 11.14                  | 390.3                 | 503.1                 |
| XDC08-24                             | 159.4 | 0.080983                          | 0.001070   | 0.003006                          | 0.000033   | 0.283015                          | 0.000013   | 0.283006                               | 11.77                  | 355.1                 | 455.1                 |
| XDC08-26                             | 164.9 | 0.046846                          | 0.000359   | 0.001958                          | 0.000016   | 0.283074                          | 0.000013   | 0.283068                               | 14.08                  | 258.6                 | 310.8                 |
| XDC08-28                             | 168.8 | 0.072299                          | 0.000030   | 0.002703                          | 0.000004   | 0.283031                          | 0.000015   | 0.283023                               | 12.58                  | 327.1                 | 410.2                 |
| XDC08-31                             | 166   | 0.072048                          | 0.000884   | 0.002996                          | 0.000035   | 0.283010                          | 0.000015   | 0.283001                               | 11.75                  | 361.3                 | 461.2                 |
| XDC08-32                             | 166.6 | 0.107650                          | 0.000375   | 0.004166                          | 0.000017   | 0.282840                          | 0.000013   | 0.282827                               | 5.62                   | 637.0                 | 853.5                 |
| 16XLN03, Lanong anorthosite          |       |                                   |            |                                   |            |                                   |            |                                        |                        |                       |                       |
| 16XLN03-1-01                         | 168.9 | 0.184966                          | 0.001100   | 0.006380                          | 0.000035   | 0.282980                          | 0.000010   | 0.282960                               | 10.37                  | 449.2                 | 552.1                 |
| 16XLN03-1-03                         | 169.9 | 0.182163                          | 0.001090   | 0.004900                          | 0.000021   | 0.283105                          | 0.000009   | 0.283089                               | 14.95                  | 231.8                 | 258.5                 |
| 16XLN03-1-04                         | 170   | 0.134067                          | 0.002150   | 0.003655                          | 0.000048   | 0.283083                          | 0.000010   | 0.283071                               | 14.32                  | 257.1                 | 299.2                 |
| 16XLN03-1-10                         | 166.2 | 0.172945                          | 0.001730   | 0.005959                          | 0.000064   | 0.283005                          | 0.000011   | 0.282986                               | 11.23                  | 403.6                 | 495.0                 |

**Table S5.** Whole-rock Sr–Nd isotopic data of the anorthosite and gabbro samples from the Dongco and Lanong ophiolites.

| Samples     | Location | Age   | Rb    | Sr     | <sup>87</sup> Sr/ <sup>86</sup> Sr | Error(1σ) | <sup>87</sup> Rb/ <sup>86</sup> Sr | ( <sup>87</sup> Sr/ <sup>86</sup> Sr) <sub>i</sub> | Sm   | Nd    | <sup>143</sup> Nd/ <sup>144</sup> Nd | <sup>147</sup> Sm/ <sup>144</sup> Nd | Error(1σ) | ( <sup>143</sup> Nd/ <sup>144</sup> Nd) <sub>i</sub> | εNd(t) | T <sub>1DM</sub> (Ma) | T <sub>2DM</sub> (Ma) | Data Sources |
|-------------|----------|-------|-------|--------|------------------------------------|-----------|------------------------------------|----------------------------------------------------|------|-------|--------------------------------------|--------------------------------------|-----------|------------------------------------------------------|--------|-----------------------|-----------------------|--------------|
| anorthosite |          |       |       |        |                                    |           |                                    |                                                    |      |       |                                      |                                      |           |                                                      |        |                       |                       |              |
| 16XLN03-1   | Lanong   | 166.8 | 2.00  | 96.00  | 0.706268                           | 0.000003  | 0.060259                           | 0.706125                                           | 0.05 | 0.24  | 0.512481                             | 0.12589                              | 0.000004  | 0.512343                                             | -1.56  | 1163.8                | 1081.8                | this study   |
| 16XLN03-4   | Lanong   | 166.8 | 0.24  | 6.86   | 0.713192                           | 0.000003  | 0.101262                           | 0.712952                                           | 0.42 | 1.83  | 0.512563                             | 0.13868                              | 0.000004  | 0.512411                                             | -0.24  | 1196.4                | 974.3                 | this study   |
| 16XLN03-7   | Lanong   | 166.8 | 0.26  | 6.59   | 0.707136                           | 0.000002  | 0.114127                           | 0.706865                                           | 0.96 | 4.07  | 0.512604                             | 0.14253                              | 0.000003  | 0.512448                                             | 0.49   | 1172.5                | 915.1                 | this study   |
| 16XLN08-2   | Lanong   | 166.8 | 0.57  | 308.00 | 0.706070                           | 0.000003  | 0.005353                           | 0.706058                                           | 2.85 | 10.86 | 0.512700                             | 0.15858                              | 0.000003  | 0.512527                                             | 2.02   | 1248.1                | 790.1                 | this study   |
| DC01        | Dongco   | 169.0 | 3.59  | 205.00 | 0.703736                           | 0.000004  | 0.050640                           | 0.703614                                           | 0.14 | 0.77  | 0.512875                             | 0.10986                              | 0.000008  | 0.512753                                             | 6.50   | 406.4                 | 426.6                 | this study   |
| DC03        | Dongco   | 169.0 | 2.07  | 198.00 | 0.704187                           | 0.000005  | 0.030233                           | 0.704114                                           | 0.21 | 0.91  | 0.512937                             | 0.13944                              | 0.000008  | 0.512782                                             | 7.06   | 441.5                 | 380.4                 | this study   |
| DC06        | Dongco   | 169.0 | 2.31  | 204.00 | 0.703556                           | 0.000004  | 0.032744                           | 0.703477                                           | 0.12 | 0.63  | 0.512951                             | 0.11510                              | 0.000009  | 0.512824                                             | 7.88   | 309.6                 | 313.9                 | this study   |
| DC08        | Dongco   | 169.0 | 1.89  | 174.00 | 0.703670                           | 0.000005  | 0.031410                           | 0.703595                                           | 0.16 | 0.78  | 0.512963                             | 0.12395                              | 0.000008  | 0.512826                                             | 7.91   | 320.2                 | 310.8                 | this study   |
| gabbro      |          |       |       |        |                                    |           |                                    |                                                    |      |       |                                      |                                      |           |                                                      |        |                       |                       |              |
| 16XLN02-1   | Lanong   | 167.3 | 0.56  | 12.35  | 0.706360                           | 0.000002  | 0.131156                           | 0.706048                                           | 0.36 | 1.31  | 0.512712                             | 0.16605                              | 0.000011  | 0.512530                                             | 2.10   | 1405.0                | 784.1                 | this study   |
| 16XLN02-3   | Lanong   | 167.3 | 0.58  | 22.70  | 0.706391                           | 0.000003  | 0.073905                           | 0.706215                                           | 0.22 | 0.83  | 0.512587                             | 0.16016                              | 0.000013  | 0.512411                                             | -0.22  | 1606.8                | 973.6                 | this study   |
| 16XLN07-1   | Lanong   | 167.3 | 20.30 | 350.00 | 0.706225                           | 0.000005  | 0.167761                           | 0.705826                                           | 0.40 | 1.45  | 0.512816                             | 0.16669                              | 0.000004  | 0.512633                                             | 4.11   | 1089.4                | 620.4                 | this study   |
| 16XLN07-4   | Lanong   | 167.3 | 20.60 | 419.00 | 0.706240                           | 0.000003  | 0.142206                           | 0.705902                                           | 0.37 | 1.37  | 0.512816                             | 0.16319                              | 0.000005  | 0.512638                                             | 4.20   | 1011.9                | 613.2                 | this study   |
| 16XLN07-5   | Lanong   | 167.3 | 15.28 | 356.00 | 0.706162                           | 0.000006  | 0.124146                           | 0.705867                                           | 0.30 | 1.28  | 0.512656                             | 0.14162                              | 0.000007  | 0.512500                                             | 1.52   | 1049.0                | 831.6                 | this study   |
| 16XLN09-3   | Lanong   | 167.3 | 8.31  | 371.00 | 0.706119                           | 0.000005  | 0.064787                           | 0.705965                                           | 0.28 | 1.17  | 0.512609                             | 0.14461                              | 0.000006  | 0.512451                                             | 0.55   | 1196.2                | 910.5                 | this study   |
| 16XLN09-4   | Lanong   | 167.3 | 0.30  | 18.33  | 0.706726                           | 0.000004  | 0.047342                           | 0.706613                                           | 0.95 | 3.34  | 0.512644                             | 0.17187                              | 0.000004  | 0.512455                                             | 0.64   | 1848.3                | 903.4                 | this study   |
| 16XLN09-5   | Lanong   | 167.3 | 0.27  | 15.08  | 0.706607                           | 0.000006  | 0.051790                           | 0.706484                                           | 0.47 | 1.78  | 0.512557                             | 0.15955                              | 0.000005  | 0.512382                                             | -0.79  | 1671.0                | 1019.3                | this study   |
| 11 DC-1     | Dongco   | 167.0 | 3.88  | 92.01  | 0.704093                           | 0.000003  | 0.121978                           | 0.703803                                           | 0.34 | 0.78  | 0.513095                             | 0.26084                              | 0.000002  | 0.512810                                             | 7.55   | -181.4                | 338.9                 | [12]         |
| 11 DC-3     | Dongco   | 167.0 | 0.26  | 67.16  | 0.703420                           | 0.000002  | 0.011367                           | 0.703393                                           | 0.21 | 0.39  | 0.513125                             | 0.33172                              | 0.000007  | 0.512763                                             | 6.62   | -33.7                 | 414.6                 | [12]         |
| 11 DC-6     | Dongco   | 167.0 | 2.12  | 75.48  | 0.703488                           | 0.000002  | 0.081256                           | 0.703295                                           | 0.93 | 2.38  | 0.513067                             | 0.23540                              | 0.000002  | 0.512810                                             | 7.55   | -590.4                | 339.2                 | [12]         |
| 12 DC-16    | Dongco   | 167.0 | 3.33  | 91.53  | 0.703638                           | 0.000002  | 0.105109                           | 0.703388                                           | 0.89 | 2.49  | 0.513074                             | 0.21641                              | 0.000003  | 0.512838                                             | 8.09   | -4243.4               | 294.9                 | [12]         |

**Table S6.** Ages of arc-related rocks from the Northern Lhasa terrane and Southern Qiangtang terrane, Tibetan Plateau.

| Samples Location           | Ages (Ma)   | lithology             | References |
|----------------------------|-------------|-----------------------|------------|
| Southern Qiangtang terrane |             |                       |            |
| Gerze                      | 87.0 ± 0.8  | rhyolites             | [35]       |
| Gerze                      | 97.1 ± 0.6  | rhyolites             | [35]       |
| Gerze                      | 99.3 ± 1.1  | rhyolites             | [35]       |
| Biluoco area               | 95.4 ± 0.9  | andesite              | [35]       |
| Biluoco area               | 94.4 ± 0.81 | andesite              | [35]       |
| Duobuzha                   | 113.4 ± 1.5 | andesite              | [36]       |
| Duobuzha                   | 113.8 ± 1.4 | andesite              | [36]       |
| Duobuzha                   | 117.6 ± 1.5 | rhyolite              | [36]       |
| Duolong                    | 117.9 ± 1.5 | Basaltic andesites    | [37]       |
| Duolong                    | 105.7 ± 1.7 | Basaltic andesites    | [37]       |
| Duolong                    | 121.5 ± 1.2 | Basaltic andesites    | [37]       |
| Duolong                    | 111.9 ± 1.9 | andesite              | [37]       |
| Duolong                    | 118.5 ± 1.4 | basaltic andesite     | [37]       |
| Duolong                    | 106.4 ± 1.4 | basaltic andesite     | [37]       |
| Maierze area               | 122.0 ± 1.0 | basalt                | [38]       |
| Maierze area               | 120.0 ± 1.0 | dacites               | [38]       |
| Along Tso                  | 120.8 ± 1.2 | diabasic dyke         | [39]       |
| Bizha area                 | 121.3 ± 0.9 | gabbroic diorite      | [40]       |
| Bizha area                 | 122.9 ± 1.9 | pyroxene diorite      | [40]       |
| Bizha area                 | 122.2 ± 1.8 | pyroxene diorite      | [40]       |
| Bizha area                 | 121.8 ± 1.7 | pyroxene diorite      | [40]       |
| Gerze                      | 153.0 ± 1.9 | diorite               | [41]       |
| Gerze                      | 152.7 ± 1.4 | diorite               | [41]       |
| Gerze                      | 148.4 ± 2.5 | diorite               | [41]       |
| Gerze                      | 151.7 ± 1.3 | granodiorite          | [41]       |
| Gerze                      | 148.1 ± 1.5 | granodiorite          | [41]       |
| Gerze                      | 111.7 ± 0.9 | granodiorite porphyry | [41]       |
| Gerze                      | 122.4 ± 0.4 | andesite              | [42]       |
| Gerze                      | 124.4 ± 0.4 | andesite              | [42]       |
| Gerze                      | 157.5 ± 2.2 | diorite               | [43]       |
| Gerze                      | 148.4 ± 1.4 | granodiorite          | [43]       |
| Gerze                      | 156.3 ± 3.3 | dioritic enclave      | [43]       |
| Gerze                      | 150.6 ± 8.5 | andesite              | [43]       |
| Gerze                      | 106.6 ± 0.8 | andesite              | [43]       |
| Gerze                      | 106.6 ± 0.8 | andesite              | [43]       |
| Gerze                      | 107.0 ± 0.9 | andesite              | [43]       |
| Gerze                      | 112.3 ± 1.0 | granodiorite          | [43]       |
| Gerze                      | 109.0 ± 1.8 | granodiorite          | [43]       |
| Gerze                      | 151.7 ± 1.0 | granodiorite          | [43]       |
| Gerze                      | 149.6 ± 0.8 | granodiorite          | [43]       |
| Gerze                      | 122.9 ± 1.7 | diorite               | [43]       |
| Gerze                      | 155.1 ± 4.5 | granodiorite          | [44]       |
| Gerze                      | 145.0 ± 1.0 | granodiorite          | [44]       |
| Gerze                      | 111.0 ± 2.0 | volcanic              | [44]       |
| Gerze                      | 107.0 ± 1.0 | volcanic              | [44]       |
| Gerze                      | 116.0 ± 2.0 | volcanic              | [44]       |
| Gerze                      | 147.3 ± 1.1 | granodiorite          | [45]       |
| Zhabuyebei                 | 134.1 ± 0.8 | granodiorite          | [46]       |
| Galale                     | 155.6 ± 1.1 | granodiorite          | [46]       |
| Gerze                      | 142.2 ± 0.4 | granodiorite          | [46]       |
| Sena                       | 122.0 ± 1.8 | granodiorite          | [47]       |
| Gerze                      | 163.6 ± 1.2 | Granodiorite          | [48]       |



|                        |             |                                      |      |
|------------------------|-------------|--------------------------------------|------|
| Gerze                  | 161.2 ± 1.4 | Granodiorite porphyry                | [48] |
| Gerze                  | 168.4 ± 1.7 | Diorite                              | [48] |
| Gerze                  | 153.1 ± 1.3 | Diorite                              | [48] |
| Gerze                  | 150.1 ± 1.2 | Granodiorite                         | [48] |
| Gerze                  | 160.3 ± 1.6 | Diorite                              | [48] |
| BH-83-1                | 120.0 ± 1.0 | Granodiorite                         | [48] |
| BH-83-1                | 164.0 ± 1.9 | Granodiorite                         | [48] |
| BH-83-1                | 165.7 ± 1.6 | Granodiorite                         | [48] |
| BH-83-1                | 164.5 ± 1.2 | Granodiorite                         | [48] |
| SJ-1                   | 123.1 ± 2.1 | Diorite                              | [48] |
| SJ-1                   | 160.7 ± 1.2 | Diorite                              | [48] |
| SJ-1                   | 161.0 ± 1.0 | Diorite                              | [48] |
| Amdo                   | 228.6 ± 1.6 | basalts                              | [49] |
| Amdo                   | 220.0 ± 2.1 | pillow lavas                         | [49] |
| Northern Lhasa terrane |             |                                      |      |
| Nagqu                  | 112.7 ± 0.7 | Andesite                             | [50] |
| Nagqu                  | 109.2 ± 3.5 | Rhyolite dacite                      | [51] |
| Nagqu                  | 111.9 ± 1.2 | Andesite                             | [51] |
| Nagqu                  | 116.3 ± 1.4 | Andesite                             | [52] |
| Nagqu                  | 111.8 ± 0.7 | Andesite                             | [52] |
| Bange                  | 122.1 ± 0.9 | Andesite                             | [53] |
| Baerda                 | 113.6 ± 0.7 | Granodiorite-porphyry                | [54] |
| Baerda                 | 114.6 ± 0.8 | andesitic porphyrite                 | [54] |
| Gerenco                | 113.6 ± 1.1 | Andesite                             | [55] |
| Zhalongqiongwa         | 85.6 ± 0.5  | quartz monzonite                     | [56] |
| Zhalongqiongwa         | 85.5 ± 0.8  | quartz monzonite                     | [56] |
| Rusong                 | 82.0 ± 1.1  | granodiorite                         | [57] |
| Rusong                 | 82.9 ± 1.3  | granodiorite                         | [57] |
| Rusong                 | 90.7 ± 1.2  | granodiorite                         | [57] |
| Rusong                 | 79.6 ± 0.3  | granite porphyry                     | [58] |
| Rusong                 | 76.9 ± 1.2  | dioritic porphyrite                  | [58] |
| Nyima                  | 91.0 ± 0.8  | dacite                               | [59] |
| Minqianri              | 91.2 ± 0.2  | Basaltic, andesite, andesite, dacite | [60] |
| Balazha                | 88.0 ± 1.6  | Granodiorite-porphyry                | [61] |
| Gaerqiong              | 87.1 ± 0.4  | Quartz diorite                       | [62] |
| Sebuta                 | 89.7 ± 1.8  | Biotite granite                      | [63] |
| Xiongba                | 90.0 ± 0.5  | Miocene ultra-K volcanic rocks       | [64] |
| Gaerqiong              | 84.6 ± 1.0  | dioritic porphyrite                  | [65] |
| Gaerqiong              | 84.6 ± 1.1  | dioritic porphyrite                  | [65] |
| Bange-Naqu-Sangba      | 122.1 ± 0.9 | Andesite                             | [66] |
| Bange-Naqu-Sangba      | 113.4 ± 1.7 | Biotite monzogranite                 | [66] |
| Bange-Naqu-Sangba      | 108.9 ± 2.6 | Biotite granite                      | [66] |
| Bange-Naqu-Sangba      | 110.7 ± 0.6 | Syenogranite                         | [66] |
| Bange-Naqu-Sangba      | 110.7 ± 0.8 | Monzogranite                         | [66] |
| Bange-Naqu-Sangba      | 111.9 ± 0.9 | Dacite                               | [66] |
| Bange-Naqu-Sangba      | 110.8 ± 0.6 | Andesite                             | [66] |
| Bange-Naqu-Sangba      | 118.4 ± 0.5 | Monzogranite                         | [66] |
| Bange-Naqu-Sangba      | 127.0 ± 1.6 | Bt granite                           | [66] |
| Bange-Naqu-Sangba      | 130.4 ± 1.0 | Dacite                               | [66] |
| Bange-Naqu-Sangba      | 117.4 ± 1.3 | Hb granite                           | [66] |
| Bange-Naqu-Sangba      | 117 ± 2.8   | Granite                              | [66] |
| Bange-Naqu-Sangba      | 111.7 ± 1.6 | Granite                              | [66] |
| Bange-Naqu-Sangba      | 123.3 ± 3.2 | Granite                              | [66] |
| Bange-Naqu-Sangba      | 120.8 ± 1.5 | Bt granite                           | [66] |
| Bange-Naqu-Sangba      | 103.3 ± 2.0 | Granite                              | [66] |
| Bange-Naqu-Sangba      | 108.9 ± 0.8 | Bt diorite                           | [66] |
| Bange-Naqu-Sangba      | 114.6 ± 1.8 | Granite                              | [66] |
| Bange-Naqu-Sangba      | 119.0 ± 2.3 | Granite                              | [66] |

|                   |             |                           |      |
|-------------------|-------------|---------------------------|------|
| Bange-Naqu-Sangba | 111.8 ± 2.4 | Granite                   | [66] |
| Bange-Naqu-Sangba | 124.0 ± 3.6 | Granite                   | [66] |
| Bange-Naqu-Sangba | 117.5 ± 3.9 | Granite                   | [66] |
| Bange-Naqu-Sangba | 111.6 ± 0.5 | Granite                   | [66] |
| Bange-Naqu-Sangba | 123.3 ± 4.2 | Granite                   | [66] |
| Bange-Naqu-Sangba | 115.4 ± 0.6 | Diorite porphyry          | [66] |
| Bange-Naqu-Sangba | 116.6 ± 0.8 | Rhyolite                  | [66] |
| Bange-Naqu-Sangba | 116.4 ± 1.2 | Andesite                  | [66] |
| Bange-Naqu-Sangba | 111.4 ± 0.7 | Andesite                  | [66] |
| Bange-Naqu-Sangba | 117.2 ± 1.6 | granite                   | [66] |
| Bange-Naqu-Sangba | 121.2 ± 1.7 | granite                   | [66] |
| Bange-Naqu-Sangba | 118.0 ± 0.5 | granite                   | [66] |
| Bange-Naqu-Sangba | 114.0 ± 0.8 | granite                   | [66] |
| Bange-Naqu-Sangba | 110.0 ± 0.7 | granite                   | [66] |
| Bange-Naqu-Sangba | 109.2 ± 3.5 | rhyolite                  | [66] |
| Bange-Naqu-Sangba | 105.0 ± 0.9 | dacite                    | [66] |
| Gerze-Nyima-Bange | 112.2 ± 0.9 | Granite                   | [66] |
| Gerze-Nyima-Bange | 88.0 ± 1.6  | Monzogranite porphyry     | [66] |
| Gerze-Nyima-Bange | 91.0 ± 0.8  | Dacite                    | [66] |
| Gerze-Nyima-Bange | 115.7 ± 0.6 | Rhyolite                  | [66] |
| Gerze-Nyima-Bange | 103.0 ± 0.8 | rhyolite                  | [66] |
| Gerze-Nyima-Bange | 107.2 ± 1.0 | rhyolite                  | [66] |
| Gerze-Nyima-Bange | 105.0 ± 1.0 | dacite                    | [66] |
| Gerze-Nyima-Bange | 100.0 ± 1.0 | dacite                    | [66] |
| Yanhu             | 131.2 ± 1.4 | Andesite                  | [66] |
| Yanhu             | 110.1 ± 0.7 | Monzogranite              | [66] |
| Yanhu             | 110.6 ± 0.6 | Rhyolite                  | [66] |
| Yanhu             | 116.7 ± 1.2 | Andesite                  | [66] |
| Yanhu             | 109.0 ± 1.0 | Rhyolite                  | [66] |
| Yanhu             | 109.7 ± 0.8 | Quartz diorite porphyrite | [66] |
| Yanhu             | 127.8 ± 0.5 | Andesite                  | [66] |
| Yanhu             | 122.0 ± 0.6 | Andesite                  | [66] |
| Yanhu             | 132.0 ± 2.0 | Volcanic rocks            | [66] |
| Yanhu             | 126.4 ± 1.1 | Volcanic rocks            | [66] |
| Yanhu             | 120.0 ± 1.0 | Volcanic rocks            | [66] |

## References

1. Pearce, J.A.; Cann, J.R. Tectonic Setting of Basic Volcanic Rocks determined using Trace Element Analyses. *Earth Planet. Sci. Lett.* **1973**, *19*, 290–300.
2. Polat, A.; Hofmann, A.W. Alteration and geochemical patterns in the 3.7–3.8 Ga Isua greenstone belt, West Greenland. *Precambrian Res.* **2003**, *126*, 197–218.
3. Qu, X.M.; Xin, H.B.; Zhao, Y.Y.; Wang, R.J.; Fan, X.T. Opening time of Bangong Lake Middle Tethys oceanic basin of the Tibet Plateau: constraints from petro-geochemistry and zircon U–Pb LAICPMS dating of mafic ophiolites. *Earth Sci. Front.* **2010**, *17*, 53–63. (In Chinese with English Abstract)
4. Shi, R.D. SHRIMP dating of the Bangong Lake SSZ-type ophiolite: Constraints on the closure time of ocean in the Bangong Lake-Nujiang River, northwestern Tibet. *Chin. Sci. Bull.* **2007**, *52*, 936–941.
5. Huang, Q.S.; Shi, R.D.; Ding, B.H.; Liu, D.L.; Zhang, X.R.; Fan, S.Q.; Zhi, X.C. Re–Os isotopic evidence of MOR-type ophiolite from the Bangong Co for the opening of Bangong-Nujiang Tethys Ocean. *Acta Petrol. Mineral.* **2012**, *31*, 465–478. (In Chinese with English Abstract)
6. Liang, S.; Zhou, T.; Li, D.W.; Chen, C.; Hao, H.J.; Hu, W.Y.; Li, H.L. Timing of Southward Subduction of Meso-tethys in Bangong Lake: Constraints from Supra-Subduction Zone (SSZ)-type Gabbro. *Geotecton. Metallog.* **2017**, *41*, 989–1000. (In Chinese with English Abstract)
7. Qin, Y.D.; Li, D.W.; Liu, D.M.; Li, H.L. Opening Time of Middle Tethys Oceanic Basin: Constrained from

- Zircon U–Pb Dating of MOR-type Gabbro in Bangong Lake Ophiolite. *Geotecton. Metallog.* **2017**, *41*, 1148–1157.
8. Liu, W.L.; Xia, B.; Zhong, Y.; Cai, J.X.; Li, J.F.; Liu, H.F.; Cai, Z.R.; Sun, Z.L. Age and composition of the Rebang Co and Julu ophiolites, central Tibet: Implications for the evolution of the Bangong Meso-Tethys. *Int. Geol. Rev.* **2014**, *56*, 430–447.
  9. Yin, Z.X.; Yuan, Y.J.; Lv, B.F.; Cai, Z.R.; Zheng, H.; Huang, Q.T.; Xia, B.; Zhong, Y.; Xia, Z.Y.; Shi, X.L.; et al. Zircon U–Pb Geochronology and Hf Isotopic Constraints on Petrogenesis of Plagiogranite from the Cuomuqu Ophiolite, Bangong Lake Area, North Tibet. *Acta Geol. Sin. (Engl. Ed.)* **2015**, *89*, 418–440.
  10. Huang, Q.T.; Liu, W.L.; Xia, B.; Cai, Z.R.; Chen, W.Y.; Li, J.F.; Yin, Z.X. Petrogenesis of the Majiari ophiolite (western Tibet, China): Implications for intra-oceanic subduction in the Bangong–Nujiang Tethys. *J. Asian Earth Sci.* **2017**, *146*, 337–351.
  11. Qu, X.M.; Wang, R.J.; Xin, H.B.; Zhao, Y.Y.; Fan, X.T. Geochronology and geochemistry of igneous rocks related to the subduction of the Tethys oceanic plate along the Bangong Lake arc zone, the western Tibetan Plateau. *Geochimica* **2009**, *38*, 523–535. (In Chinese with English Abstract)
  12. Wang, B.D.; Wang, L.Q.; Chung, S.L.; Chen, J.L.; Yin, F.G.; Liu, H.; Li, X.B.; Chen, L.K. Evolution of the Bangong–Nujiang Tethyan ocean: Insights from the geochronology and geochemistry of mafic rocks within ophiolites. *Lithos* **2016**, *245*, 18–33.
  13. Wang, W.L.; Aitchison, J.C.; Lo, C.H.; Zeng, Q.G. Geochemistry and geochronology of the amphibolite blocks in ophiolitic mélanges along Bangong–Nujiang suture, central Tibet. *J. Asian Earth Sci.* **2018**, *33*, 122–138.
  14. Qiu, R.Z.; Zhou, S.; Deng, J.F.; Li, J.F.; Xiao, Q.H.; Cai, Z.Y. Dating of gabbro in the Shemalagou ophiolite in the western segment of the Bangong Co–Nujiang ophiolite belt, Tibet—with a discussion of the age of the Bangong Co–Nujiang ophiolite belt. *Geol. China* **2004**, *31*, 262–268.
  15. Wu, Y.; Chen, S.Y.; Qin, M.K.; Guo, D.F.; Guo, G.L.; Zhang, C.; Yang, J.S. Zircon U–Pb Ages of the Dongcuo Ophiolite in the Western Bangong–Nujiang Suture Zone and Their Geological Significance. *Earth Sci. J. China Univ. Geosci.* **2018**, *43*, 1070–1084.
  16. Li, J.F.; Xia, B.; Xia, L.Z.; Xu, L.F.; Liu, W.L.; Cai, Z.R.; Yang, Z.Q. Geochronology of the Dong Tso Ophiolite and the Tectonic Environment. *Acta Geol. Sin. (Engl. Ed.)* **2013b**, *87*, 1604–1616.
  17. Bao, P.S.; Xiao, X.C.; Su, L.; Wang, J. Petrological, geochemical and chronological constraints for the tectonic setting of the Dongco ophiolite in Tibet. *Sci. China Ser. D Earth Sci.* **2007**, *50*, 660–671.
  18. Zhang, K.J.; Xia, B.; Zhang, Y.X.; Liu, W.L.; Zeng, L.; Li, J.F.; Xu, L.F. Central Tibetan Meso-Tethyan oceanic plateau. *Lithos* **2014**, *210–211*, 278–288.
  19. Fan, J.J.; Li, C.; Xie, C.M.; Wang, M. Petrology, geochemistry, and geochronology of the Zhonggang ocean island, northern Tibet: Implications for the evolution of the Banggongco–Nujiang oceanic arm of the Neo-Tethys. *Int. Geol. Rev.* **2014**, *56*, 1504–1520.
  20. Fan, J.J.; Li, C.; Xie, C.M.; Wang, M.; Chen, J.W. The evolution of the Bangong–Nujiang Neo-Tethys ocean: Evidence from zircon U–Pb and Lu–Hf isotopic analyses of Early Cretaceous oceanic islands and ophiolites. *Tectonophysics* **2015**, *655*, 27–40.
  21. Fan, J.J.; Li, C.; Sun, Z.M.; Xu, W.; Wang, M.; Xie, C.M. Early Cretaceous MORB-type basalt and A-type rhyolite in northern Tibet: Evidence for ridge subduction in the Bangong–Nujiang Tethyan Ocean. *J. Asian Earth Sci.* **2018**, *154*, 187–201.
  22. Xu, W.; Li, C.; Xu, M.J.; Wu, Y.W.; Fan, J.J.; Wu, H. Petrology, geochemistry, and geochronology of boninitic dikes from the Kangqiong ophiolite: implications for the Early Cretaceous evolution of Bangong–Nujiang Neo-Tethys Ocean in Tibet. *Int. Geol. Rev.* **2015**, *57*, 2028–2043.
  23. Zeng, Y.C.; Xu, J.F.; Chen, J.L.; Wang, B.D.; Kang, Z.Q.; Huang, F. Geochronological and geochemical constraints on the origin of the Yunzhug ophiolite in the Shiquanhe–Yunzhug–Namu Tso ophiolite belt, Lhasa Terrane, Tibetan Plateau. *Lithos* **2018**, *300–301*, 250–260.

24. Zhu, D.C.; Pan, G.T.; Mo, X.X.; Wang, L.Q.; Zhao, Z.D.; Liao, Z.L.; Geng, Q.R.; Dong, G.C. Identification for the Mesozoic OIB-type Basalts in Central Qinghai-Tibetan Plateau: Geochronology, Geochemistry and Their Tectonic Setting. *Acta Geol. Sin.* **2006**, *80*, 1312–1328.
25. Xia, B.; Xu, L.F.; Wei, Z.Q.; Zhang, Y.Q.; Wang, R.; Li, J.F.; Wang, Y.B. SHRIMP zircon dating of gabbro from the Dongqiao ophiolite in Tibet and its geological implications. *Acta Geol. Sin.* **2008**, *82*, 528–531. (In Chinese with English Abstract)
26. Liu, T.; Zhai, Q.G.; Wang, J.; Bao, P.S.; Qiangba, Z.X.; Tang, S.H.; Tang, Y. Tectonic significance of the Dongqiao ophiolite in the north-central Tibetan plateau: Evidence from zircon dating, petrological, geochemical and Sr–Nd–Hf isotopic characterization. *J. Asian Earth Sci.* **2016**, *116*, 139–154.
27. Shi, R.D.; Griffin, W.L.; O'Reilly, S.Y.; Huang, Q.S.; Zhang, X.R.; Liu, D.L.; Zhi, X.C.; Xia, Q.X.; Ding, L. Melt/mantle mixing produces podiform chromite deposits in ophiolites: Implications of Re–Os systematics in the Dongqiao Neo-tethyan ophiolite, northern Tibet. *Gondwana Res.* **2012**, *21*, 194–206.
28. Sun, L.X.; Bai, Z.D.; Xu, D.B.; Li, H.K.; Song, B. Geological Characteristics and Zircon U–Pb SHRIMP Dating of the Plagiogranite in Amduo ophiolites, Tibet. *Geol. Surv. Res.* **2011**, *34*, 10–15. (In Chinese with English Abstract)
29. Huang, Q.T.; Li, J.F.; Cai, Z.R.; Xia, L.Z.; Yuan, Y.J.; Liu, H.C.; Xia, B. Geochemistry, Geochronology, Sr–Nd Isotopic Compositions of Jiang Tso Ophiolite in the Middle Segment of the Bangong–Nujiang Suture Zone and Their Geological Significance. *Acta Geol. Sin. (Engl. Ed.)* **2015a**, *89*, 389–401.
30. Huang, Q.T.; Li, J.F.; Xia, B.; Yin, Z.X.; Zheng, H.; Shi, X.L.; Hu, X.C. Petrology, geochemistry, chronology and geological significance of JiangTso ophiolite in middle segment of Bangonghu–Nujiang suture zone, Tibet. *Earth Sci. J. China Univ. Geosci.* **2015b**, *40*, 34–48.
31. Zhong, Y.; Liu, W.L.; Xia, B.; Liu, J.N.; Guan, Y.; Yin, Z.X.; Huang, Q.T. Geochemistry and geochronology of the Mesozoic Lanong ophiolitic mélange, northern Tibet: Implications for petrogenesis and tectonic evolution. *Lithos* **2017**, *292–293*, 111–131.
32. Huang, Q.S.; Shi, R.D.; Liu, D.L.; Zhang, X.R.; Fan, S.Q.; Ding, L. Os isotopic evidence for a carbonaceous chondritic mantle source for the Nagqu ophiolite from Tibet and its implications. *Chin. Sci. Bull.* **2012**, *58*, 92–98.
33. Chen, Y.L.; Zhang, K.Z.; Yang, Z.M.; Luo, T. Discovery of a complete ophiolite section in the Jueweng area, Nagqu County, in the central segment of the Bangong Co–Nujiang junction zone. *Geol. Bull. China* **2006**, *25*, 694–699. (In Chinese with English Abstract)
34. QiangBa, Z.X.; Xie, Y.W.; Wu, Y.W.; Xie, C.M.; Li, Q.L.; Qiu, J.Q. Zircon SIMS U–Pb dating and its significance of cumulate gabbro from Dengqen ophiolite, eastern Tibet. *Geol. Bull. China* **2009**, *28*, 1253–1258.
35. Liu, D.L.; Shi, R.D.; Ding, L.; Zou, H.B. Late Cretaceous transition from subduction to collision along the Bangong–Nujiang Tethys: New volcanic constraints from central Tibet. *Lithos* **2018**, *296*, 452–470.
36. Zhang, T.Y.; Xie, C.M.; Li, C.; Fan, J.J.; Wang, M.; Wu, Y.D. Early Cretaceous continental arc-related volcanic rocks in the Duobuzha area, northern Tibet: implications for evolution history of the Bangong–Nujiang Ocean. *Int. Geol. Rev.* **2017**, *59*, 1786–1803.
37. Li, J.X.; Qin, K.Z.; Li, G.M.; Xiao, B.; Zhao, J.X.; Chen, L. Magmatic-hydrothermal evolution of the Cretaceous Duolong gold-rich porphyry copper deposit in the Bangongco metallogenic belt, Tibet: Evidence from U–Pb and  $^{40}\text{Ar}/^{39}\text{Ar}$  geochronology. *J. Asian Earth Sci.* **2011**, *41*, 525–536.
38. Fan, J.J.; Li, C.; Xie, C.M.; Wang, M.; Chen, J.W. Petrology and U–Pb zircon geochronology of bimodal volcanic rocks from the Maierze Group, northern Tibet: Constraints on the timing of closure of the Banggong–Nujiang Ocean. *Lithos* **2015**, *227*, 148–160.
39. Zhu, D.C.; Li, S.M.; Cawood, P.A.; Wang, Q.; Zhao, Z.D.; Liu, S.A.; Wang, L.Q. Assembly of the Lhasa and Qiangtang terranes in central Tibet by divergent double subduction. *Lithos* **2016**, *245*, 7–17.
40. Hao, L.L.; Wang, Q.; Wyman, D.A.; Ou, Q.; Dan, W.; Jiang, Z.Q.; Yang, J.H.; Li, J.; Long, X.P. Andesitic

crustal growth via mélangé partial melting: Evidence from Early Cretaceous arc dioritic/andesitic rocks in southern Qiangtang, central Tibet. *Geochem. Geophys. Geosyst.* **2016**, *17*, 1641–1659.

41. Hao, L.L.; Wang, Q.; Wyman, D.A.; Ou, Q.; Dan, W.; Jiang, Z.Q.; Wu, F.Y.; Yang, J.H.; Long, X.P.; Li, J. Underplating of basaltic magmas and crustal growth in a continental arc: Evidence from Late Mesozoic intermediate-felsic intrusive rocks in southern Qiangtang, central Tibet. *Lithos* **2016**, *245*, 223–242.
42. Liu, S.; Hu, R.Z.; Gao, S.; Feng, C.X.; Coulson, I.M.; Feng, G.Y.; Qi, Y.Q.; Yang, Y.H.; Yang, C.G.; Tang, L. U–Pb zircon age, geochemical and Sr–Nd isotopic data as constraints on the petrogenesis and emplacement time of andesites from Gerze, southern Qiangtang Block, northern Tibet. *J. Asian Earth Sci.* **2012**, *45*, 150–161.
43. Zhang, Y.X.; Li, Z.W.; Yang, W.G.; Zhu, L.D.; Jin, X.; Zhou, X.Y.; Tao, G.; Zhang, K.J. Late Jurassic–Early Cretaceous episodic development of the Bangong Meso-Tethyan subduction: Evidence from elemental and Sr–Nd isotopic geochemistry of arc magmatic rocks, Gaize region, central Tibet, China. *J. Asian Earth Sci.* **2017**, *135*, 212–242.
44. Kapp, P.; Yin, A.; Harrison, T.M.; Ding, L. Cretaceous–Tertiary shortening, basin development, and volcanism in central Tibet. *Geol. Soc. Am. Bull.* **2005**, *117*, 864–878.
45. Pullen, A.; Kapp, P.; Gehrels, G.E.; Ding, L.; Zhang, Q.H. Metamorphic rocks in central Tibet: Lateral variations and implications for crustal structure. *Geol. Soc. Am. Bull.* **2011**, *123*, 585–600.
46. Du, D.D.; Qu, X.M.; Wang, G.H.; Xin, H.B.; Liu, Z.B. Bidirectional subduction of the Middle Tethys oceanic basin in the west segment of Bangonghu–Nujiang suture, Tibet: Evidence from zircon U–Pb LAICPMS dating and petrogeochemistry of arc granites. *Acta Petrol. Sin.* **2011**, *27*, 1993–2002. (In Chinese with English Abstract)
47. Duan, Z.M.; Li, G.M.; Zhang, H.; Li, Y.X.; Duan, Y.Y. Zircon U–Pb age and geochemical characteristics of the quartz monzobiorite and metallogenic background of the Sena gold deposit in Duolong metallogenic concentrated area, Tibet. *J. Jilin Univ. (Earth Sci. Ed.)* **2013**, *43*, 1864–1877. (In Chinese with English Abstract)
48. Li, S.M.; Zhu, D.C.; Wang, Q.; Zhao, Z.D.; Sui, Q.L.; Liu, S.A.; Liu, D.; Mo, X.X. Northward subduction of Bangong–Nujiang Tethys: Insight from Late Jurassic intrusive rocks from Bangong Tso in western Tibet. *Lithos* **2014**, *205*, 284–297.
49. Chen, S.S.; Shi, R.D.; Zou, H.B.; Huang, Q.S.; Liu, D.L.; Gong, X.H.; Yi, G.D.; Wu, K. Late Triassic island–arc–back–arc basin development along the Bangong–Nujiang suture zone (central Tibet): Geological, geochemical and chronological evidence from volcanic rocks. *Lithos* **2015**, *230*, 30–45.
50. Huang, Y.; Zhu, D.C.; Zhao, Z.D.; Zhang, L.L.; DePaolo, D.; Hu, Z.C.; Yuan, H.L.; Mo, X.X. Petrogenesis and implication of the andesites at similar to 113 Ma in the Nagqu region in the northern Lhasa subterranean. *Acta Petrol. Sin.* **2012**, *28*, 1603–1614.
51. Sun, S.J.; Zhang, L.P.; Ding, X.; Sun, W.D.; Zhang, Z.R. Zircon U–Pb ages, Hf isotopes and geochemical characteristics of volcanic rocks in Nagqu area, Tibet and their petrogenesis. *Acta Petrol. Sin.* **2015**, *31*, 2063–2077.
52. Li F.Q.; Liu W.; Geng Q. R. Zircon LA–ICP–MS U–Pb ages of the Mesozoic volcanic rocks in Nagqu area of Gangdise in Tibet and their geological significance. *Acta Geosci. Sin.* **2010**, *31*, 781–790.
53. Chen, Y.; Zhu, D.C.; Zhao, Z.D.; Zhang, L.L.; Liu, M.; Yu, F.; Guan, Q.; Mo, X.X. Geochronology, geochemistry and petrogenesis of the Bamco andesites from the northern Gangdese, Tibet. *Acta Petrol. Sin.* **2010**, *26*, 2193–2206.
54. Zhang, L.L.; Zhu, D.C.; Zhao, Z.D.; Dung, G.C.; Mo, X.X.; Guan, Q.; Liu, M.; Liu, M.H. Petrogenesis of magmatism in the Baerda region of Northern Gangdese, Tibet: Constraints from geochemistry, geochronology and Sr–Nd–Hf isotopes. *Acta Petrol. Sin.* **2010**, *26*, 1871–1888.
55. Kang, Z.Q.; Xu, J.F.; Dong, Y.H.; Wang, B.D. Cretaceous volcanic rocks of Zenong Group in north-middle Lhasa block: products of southward subducting of the Slainajap ocean? *Acta Petrol. Sin.* **2008**, *24*, 303–314.
56. Li, J.X.; Qin, K.Z.; Li, G.M.; Richards, J.P.; Zhao, J.X.; Cao, M.J. Geochronology, geochemistry, and zircon Hf

isotopic compositions of Mesozoic intermediate–felsic intrusions in central Tibet: Petrogenetic and tectonic implications. *Lithos* **2014**, *198*–199, 77–91.

57. Zhang, S.; Shi, H.F.; Hao, H.J.; Li, D.W.; Lin, Y.; Feng, M.X. Geochronology, geochemistry and tectonic significance of Late Cretaceous adakites in Bangong Lake, Tibet. *Earth Sci. J. China Univ. Geosci.* **2014**, *39*, 509–524. (In Chinese with English Abstract)
58. Jiang, J.H.; Wang, R. J.; Qu, X. M.; Xin, H. B.; Wang, Z. Z. Crustal extension of the Bangong Lake arc zone, western Tibetan Plateau, after the closure of the Tethys Oceanic Basin. *Earth Sci.* **2011**, *36*, 1021–1032. (In Chinese with English Abstract)
59. Wang, Q.; Zhu, D.C.; Zhao, Z.D.; Liu, S.A.; Chung, S.L.; Li, S.M.; Liu, D.; Dai, J.G.; Wang, L.Q.; Mo, X.X. Origin of the ca. 90 Ma magnesia-rich volcanic rocks in SE Nyima, central Tibet: Products of lithospheric delamination beneath the Lhasa–Qiangtang collision zone. *Lithos* **2014**, *198*, 24–37.
60. Ma, G.L.; Yue, Y.H. Cretaceous volcanic rocks in northern Lhasa Block: constraint on the tectonic evolution of Gangdise Arc. *Acta Petrol. Mineral.* **2010**, *29*, 525–538. (In Chinese with English Abstract)
61. Yu, H.X.; Chen, J.L.; Xu, J.F.; Wang, B.D.; Wu, J.B.; Liang, Y.H. Geochemistry and origin of Late Cretaceous (90 Ma) mineral porphyry of Balazha in mid-northern Lhasa terrane, Tibet. *Acta Petrol. Sin.* **2011**, *27*, 2011–2022. (In Chinese with English Abstract)
62. Yao, X.F.; Tang, J.X.; Li, Z.J.; Deng, S.L.; Ding, S.; Hu, Z.H.; Zhang, Z. The redefinition of the ore-forming porphyry's age in Gaerqiong skarn-type gold-copper deposit, Western Bangong Lake–Nujiang River metallogenic belt, Xizang (Tibet). *Geol. Rev.* **2013**, *59*, 193–201. (In Chinese with English Abstract)
63. Huang, H.X.; Li, G.M.; Chen, H.A.; Shi, H.Z.; Liu, B.; Zhu, X.P.; Zeng, Q.G.; Li, Z. Molybdenite Re–Os isotope age and metallogenic significance of Sebuta copper molybdenum deposit in Tibet. *Acta Geol. Sin.* **2013**, *87*, 240–244. (In Chinese with English Abstract)
64. Liu, D.; Zhao, Z.D.; Zhu, D.C.; Niu, Y.L.; Harrison, T.M.. Zircon xenocrysts in Tibetan ultrapotassic magmas: Imaging the deep crust through time. *Geology* **2014**, *42*, 43–46.
65. Lei M. *Early Late Cretaceous Magmatic Activity in Central and North Lhasa Subterranean, and Their Tectonic Implication*; Master's Thesis, Guangzhou Institute of Geochemistry, Chinese Academy of Sciences: Guangzhou, China, 2016.
66. Li, S.M.; Wang, Q.; Zhu, D.C.; Stern, R.J.; Cawood, P.A.; Sui, Q.L.; Zhao, Z. One or two Early Cretaceous arc systems in the Lhasa Terrane, southern Tibet. *J. Geophys. Res. Solid Earth* **2018**, *123*, 3391–3413.

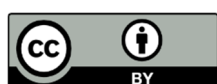

© 2019 by the authors. Licensee MDPI, Basel, Switzerland. This article is an open access article distributed under the terms and conditions of the Creative Commons Attribution (CC BY) license (<http://creativecommons.org/licenses/by/4.0/>).
